1           **Multiple roles of the non-structural protein 3 (nsP3)**  
2 **alphavirus unique domain (AUD) during Chikungunya virus**  
3           **genome replication and transcription**

4 **Yanni Gao, Niluka Goonawardane, Andrew Tuplin and Mark Harris\***

5 School of Molecular and Cellular Biology, Faculty of Biological Sciences and Astbury

6 Centre for Structural Molecular Biology, University of Leeds, Leeds, LS2 9JT, UK

7 \* Corresponding author: e-mail: [m.harris@leeds.ac.uk](mailto:m.harris@leeds.ac.uk)

8 **Running Title:** Chikungunya virus nsP3 AUD function

9 **Word Counts:**

10 Abstract: 243, author summary: 143, main text (excluding figure legends): 7015

11 Twelve figures, one table, two supplementary figures.

12

## Abstract

13 Chikungunya virus (CHIKV) is a re-emerging *Alphavirus* causing fever, joint pain, skin  
14 rash, arthralgia, and occasionally death. Antiviral therapies and/or effective vaccines  
15 are urgently required. CHIKV biology is poorly understood, in particular the functions  
16 of the non-structural protein 3 (nsP3). Here we present the results of a mutagenic  
17 analysis of the alphavirus unique domain (AUD) of nsP3. Informed by the structure of  
18 the Sindbis virus AUD and an alignment of amino acid sequences of multiple  
19 alphaviruses, a series of mutations in the AUD were generated in a CHIKV sub-  
20 genomic replicon. This analysis revealed an essential role for the AUD in CHIKV RNA  
21 replication, with mutants exhibiting species- and cell-type specific phenotypes. To test  
22 if the AUD played a role in other stages of the virus lifecycle, the mutant panel was  
23 also analysed in the context of infectious CHIKV. Results indicated that, in addition to  
24 a role in RNA replication, the AUD was also required for virus assembly. Further  
25 analysis revealed that one mutant (P247A/V248A) specifically blocked transcription of  
26 the subgenomic RNA leading to a dramatic reduction in synthesis of the structural  
27 proteins and concomitant reduction in virus production. This phenotype could be  
28 explained by both a reduction in the binding of the P247A/V248A mutant nsP3 to viral  
29 genomic RNA *in vivo*, and the reduced affinity of the mutant AUD for the subgenomic  
30 promoter RNA *in vitro*. We propose that the AUD is a pleiotropic protein domain, with  
31 multiple functions during CHIKV RNA synthesis.

32

33

## Author summary

34 Chikungunya virus (CHIKV) is an emerging threat to world health. It is transmitted by  
35 *Aedes* species mosquitos, and has caused massive epidemics across the globe. The  
36 virus causes fever, rash, arthritis and can sometimes be fatal. The biology of CHIKV  
37 is poorly understood, to address this deficiency we aimed to identify functions of one  
38 of the viral proteins, nsP3. We focussed on the central part of this protein, termed  
39 the alphavirus unique domain (AUD) because it is unique to the genus of viruses to  
40 which CHIKV belongs – the *Alphaviruses* – and not present in other related viruses.  
41 By making changes (mutations) in the AUD and analysing the effects of these changes  
42 we show that it is involved in multiple stages of the virus lifecycle. These observations  
43 identify nsP3 and the AUD in particular as a potential target for antiviral therapy or  
44 rational vaccine design.

45

## Introduction

46 Chikungunya virus (CHIKV; family *Togaviridae*, genus *Alphavirus*) [1] is an arbovirus  
47 that causes fever, rash and arthralgia with an infrequent fatal outcome [2]. It was first  
48 isolated in Tanzania in 1952-1953 [3, 4]. During the last 50 years, numerous CHIKV  
49 re-emergences have been documented across the world, including Africa, Asia,  
50 Europe and America [5, 6]. CHIKV is transmitted to humans by mosquitoes, mainly  
51 *Aedes aegypti* and *Ae. albopictus*. The latter can reproduce in more moderate  
52 climates which means that CHIKV has spread from Southern Africa and is now present  
53 across the Americas and parts of Southern Europe (including France and Italy).  
54 Increasing global temperatures resulting from climate change raise the concern that  
55 CHIKV will spread further. In this regard, there are no antiviral therapies or safe,  
56 effective vaccines available to treat CHIKV infection.

57 CHIKV has an 11.5 kilobase positive-sense, single-stranded RNA genome that is both  
58 capped and polyadenylated, and contains two open reading frames (ORFs). The first  
59 ORF is translated directly from full-length genomic RNA and encodes the non-  
60 structural proteins nsP1 to nsP4. These four proteins are required for RNA synthesis  
61 – generating both negative and positive full-length genomic RNA and a smaller  
62 subgenomic RNA from which the second ORF is translated to yield the structural  
63 proteins (capsid, envelope glycoproteins E1-3 and the 6K viroporin). Biochemical  
64 functions have been ascribed to 3 of the nsPs: nsP1 exhibits methyl- and guanyl-  
65 transferase activities, nsP2 is a helicase/protease, and nsP4 is the RNA-dependent

## Chikungunya virus nsP3 AUD function

---

66 RNA polymerase. Although nsP3 plays an essential role in RNA replication, its  
67 biochemical functions remain largely undefined [7, 8]. It is proposed to comprise  
68 three domains: at the N-terminus is a macro-domain which exhibits both ADP-ribose  
69 and RNA binding, and ADP-ribosylhydrolase capabilities [9-11]. This is followed by the  
70 alphavirus unique domain (AUD), so called as it is only present in the *Alphavirus* genus  
71 and is absent from the closely related Rubella virus (the sole member of the *Rubivirus*  
72 genus within the *Togaviridae*), and a C-terminal hypervariable region (Fig. 1A). The  
73 latter plays an important role in virus-host interactions and may be a significant  
74 determinant of pathogenesis through interactions with cell-type-specific factors [12,  
75 13]. The AUD is located in the centre of nsP3, and despite a high level of sequence  
76 homology across the alphaviruses, the function of this domain remains elusive. Of  
77 note, the structure of the Sindbis virus (SINV) AUD has been determined in the context  
78 of a pre-cleavage fragment of the polyprotein spanning the C-terminus of nsP2  
79 (protease and methyl-transferase-like domains), and the N-terminus of nsP3 (macro-  
80 domain and AUD) [14]. This revealed that the AUD presents a unique protein fold  
81 containing a zinc coordination site. In this study we sought to investigate the function  
82 of AUD during the virus lifecycle in cells derived from both the vertebrate host and the  
83 mosquito vector, to identify targets for antiviral intervention and means of rational  
84 attenuation for vaccine development. By mutagenic analysis we demonstrate that  
85 the AUD exhibits both species- and cell-type specific phenotypes, and plays roles in  
86 both virus genome replication and structural protein expression.

87

## Results

### 88 **Construction of CHIKV subgenomic replicons with AUD mutations.**

89 To identify residues within the AUD that are conserved across the *Alphavirus* genus  
90 we first aligned the AUD amino acid sequences of a range of both Old World and New  
91 World alphaviruses (Supplementary Fig S1A). As the AUD sequences between SINV  
92 and CHIKV are highly conserved (118 of 243 residues are identical), the nsP2/nsP3  
93 protein structure of SINV [14] was referenced to identify the putative location of each  
94 of the conserved residues. Following from the above analysis, 10 residues were  
95 chosen for further study as they were located on the surface of the protein  
96 (Supplementary Fig S1B) and were either absolutely conserved throughout the  
97 alphaviruses, or in other cases were substituted by residues with similar physical  
98 characteristics (specifically the corresponding residue for both Met219 and Val260 in  
99 CHIKV is leucine in SINV) (Figs 1B and S1A). We chose to make two single  
100 substitutions (nsP3 amino acid numbering: M219A and E225A), and four double  
101 substitutions of adjacent or closely located residues (R243A/K245A, P247A/V248A,  
102 V260A/P261A and C262A/C264A). The latter two residues were shown to be  
103 involved in zinc coordination in the SINV AUD domain [14]. These mutations were  
104 cloned into a CHIKV subgenomic replicon (CHIKV-D-Luc-SGR) (Fig. 1C), derived from  
105 the ECSA strain (ICRES) (kind gift from Andres Merits, University of Tartu). This  
106 construct contains two luciferase reporter genes, a renilla luciferase (RLuc) is fused in  
107 frame within the C-terminal hypervariable domain of nsP3 in ORF1 and a firefly

## Chikungunya virus nsP3 AUD function

---

108 luciferase (FLuc) replaces the structural protein encoding region of ORF2, allowing  
109 simultaneous assessment of both input translation and genome replication. As a  
110 negative control we also created a polymerase-inactive mutant (GDD-GAA in the  
111 active site of nsP4).

112 **CHIKV subgenomic replicons exhibited different phenotypes in human,**  
113 **mammalian and mosquito cells.**

114 To analyse the effects of the AUD mutations on CHIKV genome replication, the panel  
115 of mutant CHIKV-D-Luc-SGR RNAs were transfected into a range of cell lines. As both  
116 liver and muscle are target organs for CHIKV infection we used three human cell lines.  
117 The human hepatoma cell line Huh7 are well characterised and we have previously  
118 shown [15] that they efficiently support CHIKV replication. To test any potential role of  
119 the AUD in protecting CHIKV from innate immune sensing we also used the Huh7  
120 derivative cell line Huh7.5, which have a defect in innate immunity due to a mutation  
121 in one allele of the retinoic acid-inducible gene I (RIG-I) [16]. To investigate the role of  
122 the AUD in infection of muscle cells we used a human rhabdomyosarcoma cell line,  
123 RD. Additionally, two other mammalian (non-human) cell lines were used: C2C12 (a  
124 murine myoblast cell line) and BHK-21 (baby hamster kidney cells) based on their  
125 ability to support high levels of CHIKV replication [15]. Lastly, we used two mosquito  
126 (*Ae. albopictus*) derived cell lines: U4.4 and C6/36. Of note C6/36 have a defect in  
127 RNA interference (RNAi) due to a frameshift mutation in the Dcr2 gene, leading to  
128 production of a truncated and inactive Dicer-2 protein [17]. Again, use of these cells

## Chikungunya virus nsP3 AUD function

---

129 was intended to allow us to assess any role of the AUD in counteracting mosquito  
130 innate immunity.

131 We first tested replication in the human hepatoma cell line, Huh7 (Fig. 2A). Wildtype  
132 CHIKV-D-Luc-SGR exhibited robust replication in these cells with FLuc levels (a  
133 measure of genome replication) increasing approx. 30-fold between 4-12 h post-  
134 transfection. Consistent with this, RLuc levels (reflecting both input translation and  
135 replication) increased between 4-12 h but then declined at 24 h to input levels, possibly  
136 due to preferential transcription of the sub-genomic RNA at later times. Of the mutants  
137 M219A exhibited a modest, non-significant, reduction in replication, E225A replicated  
138 as wild type, but the other four nsP3 mutants and the nsP4 GAA mutant failed to  
139 replicate. The replication defect was indicated by either a reduction or a minimal  
140 increase in both RLuc and FLuc values from 4-24 h. A similar picture emerged when  
141 the mutant panel was screened in Huh7.5 cells (Fig. 2B). Consistent with the defect in  
142 cytosolic RNA sensing, replication of wildtype, M219A and E225A was higher in  
143 Huh7.5 cells compared to Huh7, however, this did not allow replication of the inactive  
144 mutants. For RD human rhabdomyosarcoma cells, a slightly different picture emerged  
145 (Fig. 2C): firstly both M219A and E225A replicated to a similar level as wildtype.  
146 Secondly, the P247A/V248A mutant, which was unable to replicate in Huh7 or Huh7.5  
147 cells, was able to replicate to a low level in RD cells. The other 3 mutants and nsP4  
148 GAA again failed to replicate.



## Chikungunya virus nsP3 AUD function

---

149 We then evaluated the mutant panel in two other mammalian cell lines: C2C12 murine  
150 myoblasts (Fig 3A) and BHK-21 (Fig 3B). Wildtype CHIKV-D-Luc-SGR replicated to  
151 very high levels in both cell lines, with FLuc levels increasing ~1000-fold between 4-  
152 24 h. Overall the phenotypes of the panel of mutants were similar to those observed  
153 in RD, however two noticeable differences were observed. Firstly, R243A/K245A  
154 showed a low replication level in C2C12 cells. Secondly, P247A/V248A was capable  
155 of robust replication in both (albeit nearly 10-fold lower than wildtype). Interestingly,  
156 although FLuc levels for P247A/V248A were reduced, the concomitant RLuc levels  
157 were higher than wildtype, suggesting that although this mutant is replication  
158 competent there may be a defect in translation of ORF2. These data suggested that  
159 P247 and V248 were required for CHIKV genome replication in liver-derived cells,  
160 whilst enhancing but not essential for replication in cells derived from muscle or kidney,  
161 implying some cell type specific interactions of nsP3. V261A/P261A (adjacent to the  
162 zinc-binding site), and the zinc-coordinating cysteine mutant C262A/C264A were  
163 unable to replicate in either cell line, being indistinguishable from the GAA nsP4  
164 control.

165 As a mosquito transmitted virus, CHIKV must replicate in both mammalian and  
166 mosquito cells. We therefore proceeded to evaluate the replicative capacity of the  
167 mutant panel in cells derived from the *Ae. albopictus* mosquito. Two cell lines were  
168 used: U4.4 and C6/36. The major difference between these two cell lines is that C6/36  
169 have a defect in the RNAi response due to a frameshift mutation in the Dcr2 gene [17].

## Chikungunya virus nsP3 AUD function

---

170 Consistent with this, although both mosquito cell lines supported robust replication,  
171 C6/36 supported higher levels than U4.4 (up to 1000-fold increase at 48 h). As  
172 described below, we observed remarkable differences in the mutant phenotypes in  
173 these cells compared to the mammalian cells (Fig. 4). The first difference was that  
174 M219A failed to replicate in U4.4 cells (Fig. 4A) but exhibited wildtype levels of  
175 replication in C6/36 cells (Fig. 4B), suggesting that M219 might be involved in  
176 interacting with, and inhibiting, the mosquito cell RNAi pathway. Secondly,  
177 R243A/K245A, which was unable to replicate in human cell lines and only showed low  
178 replication level in the C2C12 cells, was fully replication competent in both mosquito  
179 cell lines. Mutant P247A/V248A was partially replication competent in both cell lines,  
180 whereas as seen in mammalian cell lines neither V261A/P261A nor C262A/C264A  
181 replicated in mosquito cells.

182 The striking phenotypic difference between mammalian and mosquito cell lines for  
183 R243A/K245A led us to investigate this further. We considered that a simple  
184 explanation might be that the mutations had reverted in mosquito cell lines. To test  
185 this we extracted cytoplasmic RNA from C2C12, U4.4 and C6/36 cells at various time  
186 post transfection, and subjected them to RT-PCR and sequence analysis. In C2C12  
187 cells at 48 h.p.t. we did not observe any sign of reversion (Fig 4C) – the sequence  
188 remained the same as the input RNA. However, for both U4.4 at 48 h.p.t., and C6/36  
189 samples the sequence traces revealed the presence of a mixed population of mutant  
190 and wildtype. Notably we observed a sequential accumulation of revertants in the

## Chikungunya virus nsP3 AUD function

---

191 C6/36 samples: At 24 h.p.t. a very low proportion of revertants at the first position in  
192 the two codons was seen, at 48 h.p.t. the proportion increased and at 72 h.p.t. the  
193 sequences were almost entirely wildtype. These data are consistent with a  
194 requirement for R243 and K245 for efficient CHIKV genome replication.

### 195 **Role of the AUD in the context of infection of mammalian cells with CHIKV.**

196 We then sought to determine if the AUD played any role in other stages of the virus  
197 lifecycle. To test this, a subset of mutations that were able to replicate in all, or some  
198 of, the mammalian cells tested (M219A, E225A and P247A/V248A), together with the  
199 nsP4 GAA mutant as negative control, were introduced into an infectious CHIKV  
200 construct (ICRES-CHIKV). Capped *in vitro* transcribed virus RNA was electroporated  
201 into C2C12 cells and production of infectious virus was assessed by plaque assay of  
202 cell supernatants at 8, 24 and 48 h.p.e. C2C12 cells were chosen as our previous  
203 analysis had revealed that CHIKV grew to very high titres in these cells [15], and they  
204 are physiologically relevant, being muscle derived. As expected (Fig 5A), wildtype  
205 CHIKV produced a high titre of infectious virus following electroporation of C2C12 cells  
206 whereas the nsP4 GAA mutant did not produce any infectious virus. M219A and  
207 E225A were indistinguishable from wildtype, but P247A/V248A showed a significantly  
208 lower titre (approx. 10-fold reduced). Importantly, we showed by RT-PCR and  
209 sequence analysis of the infectious virus stocks, that they all retained the mutant  
210 sequence and had not undergone reversion to wildtype (Supplementary Fig S2).

## Chikungunya virus nsP3 AUD function

---

211 During the course of these assays we noted that the P247A/V248A mutant uniquely  
212 exhibited a much smaller plaque size than the wildtype (Fig. 5B). We reasoned that  
213 this might reflect a defect in either virus production or spread that could be masked in  
214 the electroporation procedure due to the high level of input RNA. To test this we  
215 performed a one-step growth assay by infecting C2C12 cells at an MOI of 0.1 with  
216 either wildtype CHIKV or the 3 mutants (M219A, E225A and P247A/V248A). Cell  
217 supernatants were harvested at various times post infection and analysed for genomic  
218 RNA by qRT-PCR (Fig 5C, and infectivity by plaque assay (Fig 5D). Wildtype,  
219 M219A and E225A showed a rapid increase in both genomic RNA and infectivity  
220 between 8-48 h.p.i., reaching very high titres (for wildtype:  $3.4 \times 10^{10}$  RNA copies/ml  
221 and  $4.7 \times 10^8$  pfu/ml). In contrast, levels of P247A/V248A accumulated very slowly,  
222 reaching a maximum of  $4.6 \times 10^6$  RNA copies/ml and  $2.8 \times 10^5$  pfu/ml at 48 h.p.i.  
223 However, direct comparison of the genomic RNA quantification with the infectivity  
224 revealed that the specific infectivity of all four viruses were indistinguishable (Fig 5E).  
225 We conclude that, although P247A/V248A exhibited a defect in production of virus  
226 particles, the virions produced were equally infectious as wildtype.

227 We then asked whether the reduced virus titre exhibited by P247A/V248A resulted  
228 from a defect in virus assembly or release from infected cells. To address this question  
229 we first analysed levels of viral genomic RNA (by qRT-PCR) and infectious virus (by  
230 plaque assay) present at 24 h.p.i. within cells infected with wildtype or the 3 mutants  
231 (at an MOI of 1). This analysis (Fig 6A) revealed that the levels of intracellular genomic

## Chikungunya virus nsP3 AUD function

---

232 RNA for wildtype, M219A and E225A were comparable whereas P247A/V248A  
233 showed a 1000-fold reduction. This was consistent with the replicon data – for  
234 P247A/V248A genomic RNA levels were reduced from a mean of  $7.9 \times 10^9$  RNA  
235 copies/ml to  $7.4 \times 10^6$ . Levels of infectious virus were similar for wildtype, M219A and  
236 E225A, however, uniquely P247A/V248A showed a dramatic  $10^7$ -fold reduction in the  
237 amount of intracellular infectious virus compared to wildtype: from  $2.4 \times 10^8$  pfu/ml to  
238  $9.8 \times 10^1$  pfu/ml. This was reflected in a dramatic change in the ratio of genomic  
239 RNA:infectivity (Fig 6B), suggesting that although P247A/V248A exhibited a defect in  
240 genome replication there was an additional, more substantial phenotype in the  
241 production of infectious virus particles. The difference in magnitude of these two  
242 phenotypes suggests that they represent different functions of the AUD. To provide  
243 further support for this observation, we performed a similar experiment in which C2C12  
244 cells were electroporated with wildtype or the 3 mutant virus RNAs (Fig 6C, D). This  
245 analysis revealed that the ratio of extra- to intracellular virus titres was significantly  
246 higher for P247A/V248A compared to wildtype and the other two mutants. We  
247 conclude that, although P247A/V248A produces less infectious virus, this can be  
248 released from the infected cells more efficiently than wildtype and the other two  
249 mutants.

### 250 **The P247A/V248A mutation selectively impairs subgenomic RNA synthesis.**

251 We considered that the reason for the reduction in virus assembly exhibited by  
252 P247A/V248A could be due to a direct role of nsP3 in this process, or some defect in

## Chikungunya virus nsP3 AUD function

---

253 the production of the structural proteins. To test this we analysed electroporated cells  
254 by western blot for the presence of both nsP3 and the capsid protein. P247A/V248A  
255 exhibited a modest reduction in nsP3 expression but a much greater reduction in the  
256 level of capsid expression. Indeed the ratio of capsid to nsP3 expression determined  
257 from the western blot analysis was approximately 10-fold lower for P247A/V248A (Fig  
258 7A). During alphavirus replication the non-structural proteins (including nsP3) are  
259 translated from the full-length genomic RNA (gRNA), whereas the capsid and other  
260 structural proteins are translated from a subgenomic RNA (sgRNA). Transcription of  
261 both positive sense RNAs is mediated by a complex of the four nsPs using the full-  
262 length negative strand as template. This complex either initiates transcription from the  
263 3'end of the negative strand or from the sub-genomic promoter. We hypothesised that  
264 the reduction in capsid expression for P247A/V248A could result from a defect in  
265 sgRNA transcription. To test this, C2C12 cells were electroporated and treated with  
266 actinomycin D (ActD) to block cellular RNA synthesis, prior to labelling with [<sup>3</sup>H]-  
267 uridine. Cellular RNA was extracted and analysed by MOPS-formaldehyde gel  
268 electrophoresis and autoradiography. As shown in Fig 7B, for WT, M219A and E225A,  
269 2 radiolabelled species corresponding to gRNA and sgRNA were detected. However,  
270 for P247A/V248A, the sgRNA was present at very low levels, almost undetectable.  
271 The corresponding ratio of gRNA:sgRNA for P247A/V248A (25.3:1) was significantly  
272 higher than that of WT (1.5:1). As controls, mock electroporated cells treated with ActD  
273 contained no [<sup>3</sup>H]-labelled RNA species, whereas in the absence of ActD the expected

## Chikungunya virus nsP3 AUD function

---

274 smear of [<sup>3</sup>H]-labelled RNAs with predominant bands corresponding to 18S and 28S  
275 ribosomal RNAs were observed (Fig 7B). To confirm these results, the harvested  
276 RNAs were also analysed by sucrose gradient centrifugation. Consistent with the  
277 electrophoretic analysis, wildtype, M219A and E225A showed two peaks  
278 corresponding to sgRNA and gRNA, whereas P247A/V248A exhibited a dramatically  
279 reduced sgRNA peak (Fig 7C).

### 280 **Effect of the P247A/V248A mutation on the RNA-binding activity of the AUD.**

281 Our data thus far are consistent with the hypothesis that the P247A/V248A mutation  
282 results in a reduction in the ability of the nsP complex to recognise and initiate  
283 transcription from the subgenomic promoter. As the AUD has been predicted to  
284 possess RNA-binding activity [14], and initiation of gRNA or sgRNA transcription by  
285 the nsP complex will require specific recognition of cognate RNA sequences on the  
286 CHIKV negative strand, we further postulated that the phenotype of the P247A/V248A  
287 might be explained by a defect in RNA binding activity. To test this we expressed  
288 wildtype and P247A/V248A AUD mutants in *E.coli* as His-Sumo fusion proteins. The  
289 AUDs were cleaved from the fusion proteins by Sumo-protease and analysed by SDS-  
290 PAGE. As shown in Fig 8A, the AUDs could be purified to a high degree of  
291 homogeneity. Circular dichroism (CD) analysis (Fig 8B) revealed that, as expected,  
292 the AUDs comprised predominantly  $\alpha$ -helix with no significant differences in the overall  
293 structure as a result of the mutations. To test for RNA-binding activity we performed a  
294 filter binding assay [18] using purified AUDs and a radiolabelled RNA corresponding

## Chikungunya virus nsP3 AUD function

---

295 to the 3' end of the CHIKV genome (3'UTR(+)), the 3' end of the genomic negative  
296 strand RNA (5'UTR(-)), or the negative strand subgenomic promoter (sg-prom(-)) (Fig  
297 8C). Both wildtype and P247A/V248A AUD were able to bind the 3'UTR(+) (Fig 8D)  
298 and 5'UTR(-) (Fig 8E), however P247A/V248A exhibited a significant increase in  $K_d$   
299 values and decrease in maximal binding levels (endpoints) compared to wildtype. As  
300 3'UTR(+) and 5'RNA(-) are involved in the initiation of negative and positive strand  
301 genome RNA synthesis, respectively; impaired binding of the P247A/V248A mutant  
302 AUD may explain the observed defect in CHIKV genome replication (Fig 3). For  
303 binding to the sg-prom(-) RNA (Fig 8F), P247A/V248A AUD showed a different  
304 phenotype with both a higher endpoint and  $K_d$  than wildtype.  $K_d$  and endpoint values  
305 are listed in Fig 8G. This result suggests that the P247A/V248A defect in sgRNA  
306 synthesis may be in part explained by a reduction in the ability to specifically bind the  
307 subgenomic promoter.

308 To explore the RNA binding activity of nsP3 to CHIKV genomic RNA during virus  
309 replication, we exploited a previously generated derivative of the ICRES infectious  
310 clone in which a twin-strep tag (TST) was introduced in frame near the C-terminus of  
311 nsP3, allowing efficient affinity purification of nsP3 by streptactin chromatography.  
312 We had previously used this experimental approach to investigate protein-protein and  
313 protein-RNA interactions of the hepatitis C virus NS5A protein [19-21]. C2C12 cells  
314 were electroporated with either wildtype or P247A/V248A mutant TST-nsP3 CHIKV  
315 RNAs. NsP3 proteins were purified from cell lysates on streptactin beads and analysed



## Chikungunya virus nsP3 AUD function

---

316 by western blot for nsP3 (Fig 9A) and qRT-PCR to determine the amount of gRNA  
317 associated with nsP3 (Fig 9B). Consistent with the *in vitro* RNA filter binding assay  
318 data, P247A/V248A bound approximately 10-fold less gRNA compared to wildtype  
319 (Fig 9C).

### 320 **Sub-cellular localisation of nsP3, capsid and dsRNA during CHIKV replication.**

321 The effect of P247A/V248A on the nsP3:gRNA interaction suggested that this  
322 mutation might also disrupt the subcellular localisation of nsP3 in relation to both  
323 replication complexes and sites of virion assembly. To test this we exploited another  
324 derivative of the ICRES infectious CHIKV clone in which ZsGreen was inserted into  
325 nsP3 at the same position as the TST tag [22, 23]. C2C12 cells were electroporated  
326 with ICRES-nsP3-ZsGreen-CHIKV RNAs (wildtype or P247A/V248A), and cells were  
327 analysed by confocal laser scanning microscopy (CLSM) with Airyscan for the  
328 distribution of nsP3, capsid (as a marker for virion assembly sites) and dsRNA (as a  
329 marker of genome replication) at different times post-electroporation. For wildtype at  
330 4 h.p.e. (Fig 10), small clusters of nsP3, capsid and dsRNA appeared in the cytoplasm  
331 but there was little co-localisation. By 8 h.p.e., nsP3, capsid and dsRNA co-localised  
332 in larger clusters, these appeared to accumulate at the plasma membrane at 12 and  
333 16 h.p.e., by which time the majority of nsP3, capsid and dsRNA were co-localised on  
334 plasma membrane. By 24 h.p.e., it was clear that the infection cycle was complete  
335 as there was a reduction in levels of nsP3, capsid and dsRNA. Interestingly, capsid  
336 and dsRNA were still co-localised at the plasma membrane while most nsP3 was

## Chikungunya virus nsP3 AUD function

---

337 perinuclear. In contrast, P247A/V248A exhibited a very different distribution pattern of  
338 all three markers throughout the infection cycle (Fig 11). Consistent with the western  
339 blot data (Fig 7A) levels of capsid and dsRNA were lower than wildtype at all  
340 timepoints, but in addition the co-localisation of nsP3, capsid and dsRNA was  
341 markedly reduced and the three markers never accumulated at the plasma membrane  
342 as seen for wildtype. Consistent with the delay in virus release shown in Fig 5, it was  
343 clear that, unlike wildtype, the infection cycle was not complete by 24 h.p.e. as levels  
344 of nsP3 and capsid were highest at this timepoint.

345 To provide a quantitative assessment of the differences between wildtype and  
346 P247A/V248A we quantified the percentage co-localisation of nsP3 with either dsRNA  
347 (Fig 12A) or capsid (Fig 12B) from 5 cells at each timepoint. As shown in Fig 12A, at  
348 all timepoints the percentage co-localisation of nsP3 with dsRNA was significantly  
349 lower for P247A/V248A. The results for nsP3 co-localisation with capsid were less  
350 clear-cut: for wildtype there was a gradual increase from 8-24 h.p.e., however for  
351 P247A/V248A levels remained fairly constant with a transient drop at 16 h.p.e.,  
352 consistent with the confocal images in Fig 11. These data are consistent with a role  
353 for the AUD, and residues P247/V248 in particular, in mediating interactions between  
354 nsP3 and both genome replication complexes and virus assembly sites. They also  
355 suggest that nsP3 is not only involved in virus genome replication, but may also play  
356 a role in the trafficking of capsid to plasma membrane.

357

358

## Discussion

359 Of the four alphavirus non-structural proteins, nsP3 remains the least well understood  
360 [24]. The protein consists of three domains, the N-terminal of which has been identified  
361 as a macrodomain that binds to ADP-ribose and possesses ADP-ribosylhydrolase  
362 activity [9]. Recent studies have proposed a role for this enzymatic activity in virus  
363 pathogenesis but as yet the underlying mechanisms remain elusive [11]. The C-  
364 terminal hypervariable domain differs dramatically in amino acid sequence between  
365 different alphaviruses and is intrinsically disordered. It has been shown to interact with  
366 a range of cellular proteins, including components of stress granules [25], and is  
367 implicated in the assembly of virus genome replication complexes.

368 In contrast, we know virtually nothing about the function of the central AUD domain.  
369 The fact that this domain is highly conserved between different alphaviruses suggests  
370 that it plays a fundamental role in the virus lifecycle. Detailed structural information  
371 about the AUD is available however, as the partial structure of the SINV nsP2-nsP3  
372 precursor, including the C-terminal protease and methyltransferase-like domains of  
373 nsP2 and the macro and AUD domains of nsP3, has been determined [14]. This  
374 analysis revealed that the AUD contained an unique zinc-binding fold with four  
375 cysteine residues coordinating a zinc molecule, this formed part of a putative RNA  
376 binding surface. Mutagenesis of two of these cysteines revealed an essential role in  
377 virus replication. Our data agree with this observation, as the C262A/C264A mutant  
378 failed to replicate in any cell type tested.

## Chikungunya virus nsP3 AUD function

---

379 Mutation of two residues adjacent to the zinc-binding cysteines, V260A/P261A, also  
380 completely abrogated CHIKV genome replication. Although adjacent in the primary  
381 amino acid sequence, these residues are located on the distal face of the AUD (Fig  
382 1B), suggesting that they are not involved in zinc binding, but may instead interact with  
383 key cellular factor(s) or play an alternative structural role.

384 In contrast, the other mutants generated during this study exhibited a number of  
385 distinct cell-type and species-specific phenotypes (summarised in Table 1). Mutation  
386 of two surface exposed basic residues (R243 and K245) abrogated replication in all  
387 mammalian cells but showed full replication capability in mosquito cells. However, this  
388 apparent discrepancy could be explained by the observation that these two mutations  
389 rapidly reverted to wildtype in mosquito cells but failed to do so in C2C12 cells (Fig  
390 4C). These data indicate that R243 and K245 are required for CHIKV genome  
391 replication. We do not have an explanation for why R243A/K245A, but not the other  
392 lethal mutations, was able to revert in mosquito cells. However it is noteworthy that  
393 the reversion to the wildtype sequence took 72 h in C6/36 cells, suggesting that  
394 perhaps the lack of cytopathology of CHIKV replication in mosquito cells could  
395 facilitate the replication of a minority species. Interestingly, the sequence trace at 24  
396 h in C6/36 shows the presence of a such minority species that would encode a Thr at  
397 243 and 245, suggesting that the two basic residues are not absolutely required.

Chikungunya virus nsP3 AUD function

398 **Table 1. AUD mutant replication phenotypes in different cell types.**

| CHIKV-D- <i>luc</i> SGR | Human |        |    | Rodent |     | Mosquito |       |
|-------------------------|-------|--------|----|--------|-----|----------|-------|
|                         | Huh7  | Huh7.5 | RD | C2C12  | BHK | U4.4     | C6/36 |
| Wildtype                | ■     | ■      | ■  | ■      | ■   | ■        | ■     |
| M219A                   | ■     | ■      | ■  | ■      | ■   | ■        | ■     |
| E225A                   | ■     | ■      | ■  | ■      | ■   | ■        | ■     |
| R243A/K245A             | ■     | ■      | ■  | ■      | ■   | ■        | ■     |
| P247A/V248A             | ■     | ■      | ■  | ■      | ■   | ■        | ■     |
| V260A/P261A             | ■     | ■      | ■  | ■      | ■   | ■        | ■     |
| C262A/C264A             | ■     | ■      | ■  | ■      | ■   | ■        | ■     |

399 **Key:** ■ Wildtype replication, ■ impaired replication, ■ no replication. ■ reversion

400

401 M219 was also of particular interest as mutation of this residue had no significant effect

402 on genome replication in any cell type apart from U4.4 mosquito cells. M219A

403 replicated well in C6/36 mosquito cells and the key difference between these two cell

404 lines is that C6/36 have a defect in the RNAi response due to a Dcr2 mutation [17].

405 We propose therefore that M219 may interact with a component of the mosquito RNAi

406 response to inhibit this key mosquito antiviral pathway. We are currently undertaking

407 proteomic and functional analysis to test this hypothesis.

408 In the second part of this study we focussed on P247A/V248A to address the

409 molecular mechanism underpinning the phenotype of this mutant. In the context of

410 the subgenomic replicon P247A/V248A showed a variety of phenotypes from

## Chikungunya virus nsP3 AUD function

---

411 complete lack of replication in Huh7 and Huh7.5 cells (Fig 2), to a 10-fold reduction in  
412 other mammalian and mosquito cells (Fig 3). Virus data in C2C12 cells were consistent  
413 with replicon results: following electroporation of viral RNA P247A/V248A showed a  
414 modest but significant defect in virus infectivity and exhibited a small plaque  
415 phenotype. Further study indicated that P247A/V248A was competent in virus entry  
416 and virus release, however, it exhibited a major defect in assembly of infectious virus  
417 particles. This defect led to both a delay and a reduction in the release of infectious  
418 virus, consistent with the small plaque phenotype. The molecular mechanism  
419 underpinning the P247A/V248A defect was shown to be a reduction in subgenomic  
420 RNA synthesis, leading to a concomitant reduction in the expression of the structural  
421 proteins. It is noteworthy that when analysed in the context of the replicon in C2C12  
422 cells, the P247A/V248A mutant exhibited a 10-fold reduction in FLuc, but RLuc was  
423 higher than wildtype. This is also consistent with a defect in transcription of the  
424 subgenomic mRNA. The reduced affinity of P247A/V248A AUD for the CHIKV sg-  
425 prom(-) RNA as demonstrated by the RNA filter binding assay may help to explain  
426 this, but it is possible that other effects of P247A/V248A, such as aberrant host protein  
427 recruitment, may also help to explain the defect in subgenomic RNA synthesis. Of  
428 note, P247A/V248A AUD also exhibited impaired binding to the 3'UTR(+) and 5'RNA(-  
429 ) *in vitro*, and also bound less genomic RNA *in vivo*, compared to wildtype, consistent  
430 with an overall defect in RNA replication. Previous studies have also shown that nsP3  
431 is important for initial replication complex formation and negative strand RNA

## Chikungunya virus nsP3 AUD function

---

432 synthesis [26]. Taken together we propose that the AUD plays a critical role in all  
433 stages of CHIKV RNA synthesis, but particularly in the transcription of the sgRNA.

434 Analysis of the distribution of nsP3, capsid and dsRNA during CHIKV replication by  
435 confocal microscopy revealed further insights into the P247A/V248A phenotype.  
436 Wildtype nsP3 exhibited a high level of co-localisation with dsRNA at all time points  
437 up to 24 h.p.e., consistent with the role of nsP3 in genome replication. At 12/16 h.p.e.  
438 both nsP3 and dsRNA also co-localised with capsid and were concentrated at the  
439 plasma membrane. In contrast, P247A/V248A nsP3 showed not only a significant  
440 reduction in the co-localisation with dsRNA, but also a loss of the plasma membrane  
441 accumulation. These observations are consistent with a role for nsP3 (and the AUD in  
442 particular) in coordinating the processes of genome replication and virus assembly to  
443 facilitate production of infectious virus particles at the plasma membrane. This is in  
444 agreement with early evidence for a juxtaposition of sites of genome replication, viral  
445 protein translation and nucleocapsid assembly in the case of Sindbis virus [27]. In  
446 addition it may be that nsP3 has a role in the trafficking of nucleocapsids from these  
447 sites (cytoplasmic vacuoles (CPVs)) to the plasma membrane.

448 In conclusion we propose that the nsP3 AUD is a multi-functional domain. It is not only  
449 a critical determinant of both cell and species-specificity, but also plays roles in virus  
450 genome replication and assembly. The rational mutagenesis of the CHIKV AUD  
451 described here is the first detailed structure-function analysis of this domain and raises  
452 many questions. In particular, we need to determine what cellular and viral proteins

## Chikungunya virus nsP3 AUD function

---

453 are interaction partners for the AUD, and investigate how these interactions shed light  
454 on the phenotypes of AUD mutants? We expect that our current proteomic analysis,  
455 exploiting both a novel SNAP-tagged nsP3 recently developed in our laboratory [28]  
456 and a One-Strep tag (OST) approach which we recently used to identify interacting  
457 partners of the hepatitis C virus NS5A protein [19], will provide some of the answers  
458 to these questions. We also hope that these studies will help to identify targets for  
459 antiviral intervention and means of rational attenuation for vaccine development.

### 460 **Acknowledgements**

461 We thank Andres Merits (Institute of Technology, University of Tartu, Estonia) for the  
462 CHIKV subgenomic replicons, ICRES constructs and antibodies to nsP3 and capsid.  
463 We thank Raymond Li (University of Leeds) for the OST-tagged ICRES constructs,  
464 and Joseph Ward (University of Leeds) for help and advice with the <sup>3</sup>H-labelling.

### 465 **Materials and Methods**

466 **Sequence alignment.** AUD amino acid sequences of different alphaviruses (Sindbis,  
467 Ockelbo, O’Nyong-Nyong, Ross River, Semliki Forest, Fort Morgan, Venezuelan,  
468 Eastern and Western Equine Encephalitis, Highlands-J and CHIKV) were obtained  
469 from NCBI and aligned by Clustal Omega. The predicted locations of conserved  
470 residues were then identified by Pymol, taking the Sindbis nsP2/3 protein structure  
471 (PDB ID code 4GUA) [14] as a reference.



## Chikungunya virus nsP3 AUD function

---

472 **Cell culture.** Mammalian cells Huh7, Huh7.5, RD, C2C12 and BHK-21 were  
473 maintained at 37°C with 5% CO<sub>2</sub> in DMEM supplemented with 10% FCS, 0.5 mM non-  
474 essential amino acids and penicillin-streptomycin (100 units/mL). Huh7 cells were  
475 obtained from John McLauchlan (Centre for Virus Research, Glasgow), Huh7.5 cells  
476 from Charles Rice (Rockefeller University, New York), RD cells from Nicola  
477 Stonehouse (University of Leeds), C2C12 cells from Michelle Peckham (University of  
478 Leeds) and BHK-21 cells from John Barr (University of Leeds). Mosquito cell lines  
479 (U4.4 and C6/36) were obtained from Susan Jacobs (The Pirbright Institute) and  
480 maintained in Leibovitz's L-15 media supplemented with 10% FBS, 10% tryptose  
481 phosphate broth and penicillin-streptomycin (100 units/mL). Mosquito cells were  
482 incubated at 28°C without CO<sub>2</sub>.

483 **Construction of CHIKV subgenomic replicons and infectious viruses with AUD**  
484 **mutations.** A fragment including the AUD was excised from the CHIKV-D-Luc-SGR  
485 plasmid, and inserted into pcDNA3.1 to generate pcDNA3.1-AUD. This was used as  
486 a template for site-directed (Quikchange) mutagenesis using specific primers (primer  
487 sequences available upon request) to produce the required AUD mutations. Finally,  
488 the AUD mutated fragments were excised and religated into the CHIKV-D-Luc-SGR.  
489 AUD fragments were subsequently excised from CHIKV-D-Luc-SGRs and ligated into  
490 ICRES-CHIKV-WT. For the One-Strep tag (OST) derivatives of wildtype and  
491 P247A/V248A synthetic oligonucleotides (sequence available upon request) were  
492 used to substitute the appropriate coding sequence [19] for the RLuc in nsP3.

## Chikungunya virus nsP3 AUD function

---

493 **Transfection and Dual-luciferase Assay.** Capped RNAs were generated from the  
494 CHIKV-D-Luc-SGR for transfection using the mMACHINE SP6 transcription kit  
495 (ThermoFisher Scientific) and purified with PureLink RNA Mini Kit (Life Technologies).  
496 Transfection of the CHIKV-D-Luc-SGR RNAs was performed in different cells using  
497 Lipofectamine 2000 (Life Technologies) according to the manufacturer's instructions.  
498 At 4, 12, 24 and 48 h post transfection (h.p.t.), cells were harvested and both Renilla  
499 and Firefly luciferase activity measured using the Dual-luciferase Assay System  
500 (Promega) according to the manufacturer's instructions. Each sample had three  
501 repeats and the data shown in this study represent the mean of three experimental  
502 replicates.

503 **Sequence analysis of subgenomic or viral RNA.** Cytoplasmic RNA from  
504 electroporated or infected cells were Trizol extracted, prior to reverse transcription with  
505 random primers using SuperScript IV Reverse Transcriptase (Invitrogen) according to  
506 the manufacturer's instructions. cDNAs were then used as a template to amplify part  
507 of nsP3 sequence (macro domain and AUD) with specific primers (primer sequences  
508 available upon request). PCR products were subjected to sequencing analysis.

509 **Titration of infectious CHIKV by plaque assay.** ICRES-CHIKV RNAs were  
510 produced and purified as described above. C2C12 cells were electroporated with  
511 ICRES-CHIKV RNAs and incubated at 37°C. Cell supernatants were collected at 8,  
512 24 and 48 hours post electroporation (h.p.e.), diluted with cell medium and applied to  
513 monolayers of BHK-21 cells for 1 h at 37°C. The inoculum was aspirated and plates

## Chikungunya virus nsP3 AUD function

---

514 were overlaid with 0.8% methylcellulose for 48 h at 37°C for plaque formation. For  
515 titration of intracellular viruses, cells were freeze/thawed 3 times and supernatants  
516 were collected by centrifugation at 12000×g for 10 min., prior to application to BHK-21  
517 cells. All virus work was performed in a Biological Containment Level 3 (BSL3)  
518 laboratory. Plaques were visualised by photography with a Canon EOS 80D.

519 **One-step virus growth curve.** Infectious CHIKV was harvested from C2C12 cells  
520 electroporated with ICRES RNAs at 48 h.p.e. Cell supernatants were titrated by plaque  
521 assay in BHK-21 cells and stored at -80°C. For virus growth kinetic analysis, C2C12  
522 cells were infected with wildtype or AUD mutant CHIKV at an MOI of 0.1 for 1 h.  
523 Infected cells were washed three times with PBS and incubated with fresh complete  
524 medium at 37°C. For RNA quantification, RNAs were extracted from supernatants  
525 Trizol (ThermoFisher Scientific). qRT-PCR for CHIKV genome RNA was performed  
526 with One-step MESA GREEN qRT-PCR MasterMix Plus for SYBR assay (Eurogentec)  
527 following the manufacturer's instructions. Primer sequences available upon request.  
528 Plaque assay was performed as described above.

529 **CHIKV RNA synthesis.** C2C12 cells were electroporated with ICRES RNAs for 10 h.  
530 Actinomycin D (1 µg/ml) was added and the cells were incubated for 2 h. [<sup>3</sup>H]-uridine  
531 (20 µCi/ml) was then added and the cells were incubated for a further 3 h., at which  
532 time the monolayers were washed 3 times with ice-cold PBS, lysed and RNA extracted  
533 with TRIzol reagent.

## Chikungunya virus nsP3 AUD function

---

534 For measurement of viral RNA synthesis, the harvested RNAs were separated on a  
535 MOPS-Formaldehyde gel. The gel was fixed (15% methanol, 10% acetic acid and  
536 75% dH<sub>2</sub>O) for 30 min followed by fluorography (Fluorographic reagent amplify, GE  
537 HEALTHCARE) for another 30 min. Gels were dried for 2 h. before exposure to  
538 autoradiographic film at -80 °C for 4 days.

539 For gradient analysis, equal volumes of harvested RNAs were loaded onto 14 ml 5-  
540 25% sucrose gradients in 100mM sodium acetate and 0.1% SDS followed by  
541 centrifugation at 150,000×g for 5 h. at room temperature . Gradients were fractionated  
542 into 350 µl fractions, and radioactivity of each fractions was determined by liquid  
543 scintillation counting.

544 **Analysis of CHIKV protein expression.** C2C12 cells were electroporated with  
545 ICRES RNAs and incubated for 36 h. Cells were washed 3 times with PBS, lysed by  
546 resuspension in Glasgow lysis buffer (GLB) [1% Triton X-100, 120 mM KCl, 30mM  
547 NaCl, 5mM MgCl<sub>2</sub>, 10% glycerol (v/v), and 10 mM piperazine-N,N'-bis (2-  
548 ethanesulfonic acid) (PIPES)-NaOH, pH 7.2] supplemented with protease inhibitors  
549 and phosphatase inhibitors (Roche Diagnostics), and incubated on ice for 15 min.  
550 Following separation by SDS-PAGE, proteins were transferred to a polyvinylidene  
551 fluoride (PVDF) membrane and blocked in 50% (v/v) Odyssey blocking buffer (LiCor)  
552 in Tris-buffered saline (TBS) [50 mM Tris, 150 mM NaCl, pH 7.4]. The membrane was  
553 incubated with primary antibody in 25% (v/v) Odyssey blocking buffer overnight at 4°C,  
554 then incubated with fluorescently labelled anti-rabbit (800nm) secondary antibodies

## Chikungunya virus nsP3 AUD function

---

555 for 1 h at room temperature (RT) before imaging on a LiCor Odyssey Sa fluorescence  
556 imager.

557 **Expression and purification of AUD proteins.** The wildtype and P247A/V248A  
558 AUD (nsP3 residues Ile141 to Gly374) were cloned into pET-28a-His-sumo for  
559 expression in *Escherichia coli* and subsequent analysis. His-sumo tagged AUD  
560 expression plasmids were transformed into Rosetta 2 and cultures were grown in  
561 Luria-Bertani (LB) medium supplemented with 50 µg/µl ampicillin and 1% (wt/vol)  
562 glucose. The cells were grown at 37°C to an optical density at 600 nm (OD<sub>600</sub>) of 0.5  
563 to 0.7 and then induced with IPTG (isopropyl-D-thiogalactopyranoside) (0.5 mM) for 5  
564 h at 18°C. The cells were harvested by centrifugation at 7,000 rpm for 10 min. Wildtype  
565 or mutant AUD protein was purified by sequential His-tag affinity purifications. Briefly,  
566 cell pellets were suspended in 20 ml AUD lysis buffer (100 mM Tris-HCl pH 7, 200 mM  
567 NaCl, 20 mM imidazole) supplemented with 2 µg/µl DNase and EDTA-free protease  
568 inhibitor cocktail tablets (Roche). The cell suspension was lysed by sonication on ice  
569 at an amplitude of 10 µm for six pulses of 20 s separated by 20 s and the extract  
570 clarified by centrifugation at 16000×g for 30 min at 4°C. The supernatant was filtered  
571 through a 0.45 µm filter and applied to a Ni<sup>2+</sup> His-tag column for purification. Purified  
572 proteins were dialyzed to remove imidazole and sumo-protease was added to cleave  
573 the His-sumo tag. After dialysis, the proteins were applied again to the His-tag  
574 purification column, and the flow-throughs were collected as purified AUD proteins.

## Chikungunya virus nsP3 AUD function

---

575 **Circular Dichroism (CD) Spectroscopy.** Far-UV CD spectroscopy was performed  
576 on an APP Chirascan CD spectropolarimeter to obtain the secondary structure of  
577 AUDs. Spectra (190-260 nm) were recorded using 200  $\mu$ l protein solution (at a  
578 concentration of 0.2 mg/ml) in a 1 mm path-length cuvette. Protein CD spectra  
579 deconvolution was analysed by DichroWeb.

580 **RNA filter binding assay.** Radiolabelled RNA transcripts and AUD proteins were  
581 diluted in binding buffer (40 mM Tris-HCl [pH 7.5], 5 mM MgCl<sub>2</sub>, 10 mM DTT, 50  $\mu$ g/ml  
582 bovine serum albumin, 10  $\mu$ g/ml yeast tRNA [Ambion]) and pre-incubated separately  
583 for 10 min at 4°C. The binding reaction was initiated by mixing 1 nM radio-labelled  
584 RNA and AUD proteins (0 to 500 nM) in a 200  $\mu$ l final volume at 4°C for 30 min.  
585 Membranes were pre-soaked in binding buffer supplemented with 5% (v/v) glycerol  
586 and assembled from bottom to top as follows in a slot-blot apparatus (Bio-Rad): filter  
587 paper, Hybond-N nylon (Amersham Biosciences) to bind free RNA molecules, and  
588 nitrocellulose (Schleicher & Schuell) to trap soluble protein-RNA complexes. After  
589 assembly, 200  $\mu$ l of each binding reaction mixture was applied to each slot and filtered  
590 through the membranes. Each slot was washed with 0.5 ml of binding buffer and air  
591 dried, and quantification of radioactivity was performed using an image plate, BAS  
592 1000 Bioimager (Fuji), and Aida Image Analyser v4.22 software. Fitting was performed  
593 using GraphPad Prism 5 software. In each case, the data were fitted to the hyperbolic  
594 equation  $R = R_{\max} \times R / (K_d + [P])$ , where R is the percentage of bound RNA,  $R_{\max}$  is the

## Chikungunya virus nsP3 AUD function

---

595 maximal percentage of RNA competent for binding, [P] is the concentration of AUD,  
596 and  $K_d$  is the apparent dissociation constant.

597 **Precipitation of nsP3 and viral RNA.** Co-precipitation experiments were performed  
598 in C2C12 cells electroporated with ICRES One-Strep-tag (OST) RNAs using  
599 Streptactin-agarose (Thermo Fisher Scientific), following the manufacturers protocol.  
600 Precipitated proteins were subjected to immunoblotting and co-precipitated RNAs  
601 were extracted by TRIzol and quantified by qRT-PCR.

602 **Distribution of nsP3, capsid protein and dsRNA in cells during CHIKV**  
603 **replication.** Wildtype and nsP3-P247A/V248A CHIKV were introduced into ICRES-  
604 nsP3-ZsGreen-CHIKV where ZsGreen was fused into the hypervariable domain of  
605 nsP3. C2C12 cells were electroporated and harvested at defined times post  
606 electroporation, fixed with 4% paraformaldehyde (PFA), permeabilised by treatment  
607 with methanol, blocked with 2% BSA, and incubated with capsid protein antibody (gift  
608 from Andres Merits) or dsRNA antibody (J2 antibody, Scicons) at 4°C overnight,  
609 followed by secondary antibodies (Alexa Fluor 633 conjugated chicken anti-rabbit IgG  
610 and Alexa Fluor 594 conjugated donkey anti-mouse IgG) for 1h at room temperature.  
611 Distribution of nsP3, capsid protein and dsRNA were detected using a Zeiss LSM880  
612 with Airyscan. Post-acquisition analysis was conducted using Zen software (Zen  
613 version 2015 black edition 2.3, Zeiss) or Fiji (v1.49) software [29].

614 **Co-localisation analysis.** For co-localisation analysis, Manders' overlap coefficient  
615 was calculated using Fuji ImageJ software with Just Another Co-localisation Plugin

## Chikungunya virus nsP3 AUD function

---

616 (JACoP) (National Institutes of Health) [30]. Coefficient M1 indicated here reports the  
617 fraction of the nsP3 signal that overlaps either the anti-dsRNA or anti-capsid signal.  
618 Coefficient values range from 0 to 1, corresponding to non-overlapping images and  
619 100% co-localisation images, respectively. Co-localisation calculations were  
620 performed on >5 cells from at least two independent experiments.

621 **Statistical analysis.** Statistical analysis was performed using unpaired two-tailed  
622 Student's t tests, unequal variance to determine statistically significant differences  
623 from the results for the wild type (n≥3). Data in bar graphs are displayed as the means  
624 ± S.E.  
625



626

## References

- 627 1. Chen R, Mukhopadhyay S, Merits A, Bolling B, Nasar F, Coffey LL, et al. ICTV  
628 Virus Taxonomy Profile: Togaviridae. *Journal of General Virology*. 2018;99(6):761-2.  
629 doi: 10.1099/jgv.0.001072.
- 630 2. Schwartz O, Albert ML. Biology and pathogenesis of Chikungunya virus. *Nature*  
631 *Reviews Microbiology*. 2010;8(7):491-500. doi: 10.1038/nrmicro2368.
- 632 3. Robinson MC. An epidemic of virus disease in Southern Province, Tanganyika  
633 Territory, in 1952-53. I. Clinical features. *Transactions of the Royal Society of Tropical*  
634 *Medicine and Hygiene*. 1955;49(1):28-32.
- 635 4. Lumsden WH. An epidemic of virus disease in Southern Province, Tanganyika  
636 Territory, in 1952-53. II. General description and epidemiology. *Transactions of the*  
637 *Royal Society of Tropical Medicine and Hygiene*. 1955;49(1):33-57.
- 638 5. Schuffenecker I, Iteman I, Michault A, Murri S, Frangeul L, Vaney MC, et al.  
639 Genome microevolution of Chikungunya viruses causing the Indian Ocean outbreak.  
640 *PLoS Med*. 2006;3(7):e263. doi: 10.1371/journal.pmed.0030263.
- 641 6. Sergon K, Njuguna C, Kalani R, Ofula V, Onyango C, Konongoi LS, et al.  
642 Seroprevalence of Chikungunya virus (CHIKV) infection on Lamu Island, Kenya,  
643 October 2004. *American Journal of Tropical Medicine and Hygiene*. 2008;78(2):333-  
644 7.
- 645 7. LaStarza MW, Lemm JA, Rice CM. Genetic analysis of the nsP3 region of Sindbis  
646 virus: evidence for roles in minus-strand and subgenomic RNA synthesis. *Journal of*  
647 *Virology* 1994;68(9):5781-91.
- 648 8. Rupp JC, Sokoloski KJ, Gebhart NN, Hardy RW. Alphavirus RNA synthesis and  
649 non-structural protein functions. *Journal of General Virology*. 2015;96(9):2483-500.  
650 doi: 10.1099/jgv.0.000249.
- 651 9. Malet H, Coutard B, Jamal S, Dutartre H, Papageorgiou N, Neuvonen M, et al.  
652 The crystal structures of Chikungunya and Venezuelan equine encephalitis virus nsP3  
653 macro domains define a conserved adenosine binding pocket. *Journal of Virology*.  
654 2009;83(13):6534-45. doi: 10.1128/JVI.00189-09.

## Chikungunya virus nsP3 AUD function

---

- 655 10. Eckeï L, Krieg S, Butepage M, Lehmann A, Gross A, Lippok B, et al. The  
656 conserved macrodomains of the non-structural proteins of Chikungunya virus and  
657 other pathogenic positive strand RNA viruses function as mono-ADP-  
658 ribosylhydrolases. *Scientific Reports*. 2017;7:41746. doi: 10.1038/srep41746.
- 659 11. McPherson RL, Abraham R, Sreekumar E, Ong SE, Cheng SJ, Baxter VK, et al.  
660 ADP-ribosylhydrolase activity of Chikungunya virus macrodomain is critical for virus  
661 replication and virulence. *Proc Natl Acad Sci U S A*. 2017;114(7):1666-71. doi:  
662 10.1073/pnas.1621485114.
- 663 12. Foy NJ, Akhrymuk M, Shustov AV, Frolova EI, Frolov I. Hypervariable domain of  
664 nonstructural protein nsP3 of Venezuelan equine encephalitis virus determines cell-  
665 specific mode of virus replication. *Journal of Virology* 2013;87(13):7569-84. doi:  
666 10.1128/JVI.00720-13.
- 667 13. Foy NJ, Akhrymuk M, Akhrymuk I, Atasheva S, Bopda-Waffo A, Frolov I, et al.  
668 Hypervariable domains of nsP3 proteins of New World and Old World alphaviruses  
669 mediate formation of distinct, virus-specific protein complexes. *Journal of Virology*  
670 2013;87(4):1997-2010. doi: 10.1128/JVI.02853-12.
- 671 14. Shin G, Yost SA, Miller MT, Elrod EJ, Grakoui A, Marcotrigiano J. Structural and  
672 functional insights into alphavirus polyprotein processing and pathogenesis. *Proc Natl*  
673 *Acad Sci U S A*. 2012;109(41):16534-9. doi: 10.1073/pnas.1210418109.
- 674 15. Roberts GC, Zothner C, Remenyi R, Merits A, Stonehouse NJ, Harris M.  
675 Evaluation of a range of mammalian and mosquito cell lines for use in Chikungunya  
676 virus research. *Scientific Reports*. 2017;7(1):14641. doi: 10.1038/s41598-017-15269-  
677 w.
- 678 16. Sumpter R, Jr., Loo YM, Foy E, Li K, Yoneyama M, Fujita T, et al. Regulating  
679 intracellular antiviral defense and permissiveness to hepatitis C virus RNA replication  
680 through a cellular RNA helicase, RIG-I. *Journal of Virology* 2005;79(5):2689-99. doi:  
681 10.1128/JVI.79.5.2689-2699.2005.
- 682 17. Morazzani EM, Wiley MR, Murreddu MG, Adelman ZN, Myles KM. Production of  
683 virus-derived ping-pong-dependent piRNA-like small RNAs in the mosquito soma.  
684 *PLoS pathogens*. 2012;8(1):e1002470. doi: 10.1371/journal.ppat.1002470.

## Chikungunya virus nsP3 AUD function

---

- 685 18. Foster TL, Belyaeva T, Stonehouse NJ, Pearson AR, Harris M. All three domains  
686 of the hepatitis C virus nonstructural NS5A protein contribute to RNA binding. *Journal*  
687 *of Virology*. 2010;84(18):9267-77. doi:10.1128/JVI.00616-10
- 688 19. Goonawardane N, Gebhardt A, Bartlett C, Pichlmair A, Harris M. Phosphorylation  
689 of Serine 225 in Hepatitis C Virus NS5A Regulates Protein-Protein Interactions.  
690 *Journal of Virology*. 2017;91(17). doi: 10.1128/JVI.00805-17.
- 691 20. Ross-Thriepland D, Harris M. Insights into the complexity and functionality of  
692 hepatitis C virus NS5A phosphorylation. *Journal of Virology*. 2014;88(3):1421-32. doi:  
693 10.1128/JVI.03017-13.
- 694 21. Yin C, Goonawardane N, Stewart H, Harris M. A role for domain I of the hepatitis  
695 C virus NS5A protein in virus assembly. *PLoS Pathogens*. 2018;14(1):e1006834. doi:  
696 10.1371/journal.ppat.1006834.
- 697 22. Remenyi R, Gao Y, Hughes RE, Curd A, Zothner C, Peckham M, et al. Persistent  
698 Replication of a Chikungunya Virus Replicon in Human Cells is Associated with  
699 Presence of Stable Cytoplasmic Granules Containing Non-structural Protein 3.  
700 *Journal of Virology*. 2018. doi: 10.1128/JVI.00477-18.
- 701 23. Pohjala L, Utt A, Varjak M, Lulla A, Merits A, Ahola T, et al. Inhibitors of alphavirus  
702 entry and replication identified with a stable Chikungunya replicon cell line and virus-  
703 based assays. *PLoS One*. 2011;6(12):e28923. doi: 10.1371/journal.pone.0028923.
- 704 24. Gotte B, Liu L, McInerney GM. The Enigmatic Alphavirus Non-Structural Protein 3  
705 (nsP3) Revealing Its Secrets at Last. *Viruses*. 2018;10(3). doi: 10.3390/v10030105.
- 706 25. Kim DY, Reynaud JM, Rasaloukaya A, Akhrymuk I, Mobley JA, Frolov I, et al.  
707 New World and Old World Alphaviruses Have Evolved to Exploit Different  
708 Components of Stress Granules, FXR and G3BP Proteins, for Assembly of Viral  
709 Replication Complexes. *PLoS Pathogens*. 2016;12(8):e1005810. doi:  
710 10.1371/journal.ppat.1005810.
- 711 26. Wang YF, Sawicki SG, Sawicki DL. Alphavirus nsP3 functions to form replication  
712 complexes transcribing negative-strand RNA. *Journal of Virology*. 1994;68(10):6466-  
713 75.

## Chikungunya virus nsP3 AUD function

---

- 714 27. Froshauer S. Alphavirus RNA replicase is located on the cytoplasmic surface of  
715 endosomes and lysosomes. *Journal of Cell Biology*. 1988;107(6):2075-86. doi:  
716 10.1083/jcb.107.6.2075.
- 717 28. Remenyi R, Roberts GC, Zothner C, Merits A, Harris M. SNAP-tagged  
718 Chikungunya Virus Replicons Improve Visualisation of Non-Structural Protein 3 by  
719 Fluorescence Microscopy. *Scientific Reports*. 2017;7(1):5682. doi: 10.1038/s41598-  
720 017-05820-0.
- 721 29. Schindelin J, Arganda-Carreras I, Frise E, Kaynig V, Longair M, Pietzsch T, et al.  
722 Fiji: an open-source platform for biological-image analysis. *Nat Methods*.  
723 2012;9(7):676-82. doi: 10.1038/nmeth.2019.
- 724 30. Bolte S, Cordelieres FP. A guided tour into subcellular colocalization analysis in  
725 light microscopy. *J Microsc*. 2006;224(Pt 3):213-32. doi: 10.1111/j.1365-  
726 2818.2006.01706.x.
- 727
- 728

729

## Figure Legends

730 **Figure 1.** (A) Three domain structure of the alphavirus nsP3 protein. (B) Surface  
731 representation of the Sindbis virus nsP3 AUD structure (PDB ID code 4GUA) [14]  
732 (residues 161-320), including the 40 amino acid flexible linker between the  
733 macrodomain and the AUD. The locations of the mutated residues in nsP3 are  
734 indicated. The two images show opposite faces of the structure, rotated 180° along  
735 the vertical axis. (C) Structure of CHIKV-D-Luc-SGR. (RLuc: Renilla luciferase,  
736 FLuc: firefly luciferase) RLuc is expressed as an internal fusion with nsP3 and thus  
737 is produced following translation of the input RNA. RLuc activity is therefore an  
738 indirect measure of both input translation and replication. FLuc is expressed from  
739 the subgenomic promoter and thus is only produced after RNA replication has  
740 occurred.

741 **Figure 2. CHIKV AUD mutant replication in human cells.** The indicated cells were  
742 transfected with CHIKV-D-luc-SGR wildtype and mutant RNAs and harvested for both  
743 RLuc and FLuc assays at the indicated time points. Luciferase values of wildtype  
744 and each mutant were normalized to 4 h values. (GAA: inactive mutant of nsP4  
745 polymerase). Significant differences denoted by \* (P<0.05), and \*\* (P<0.01),  
746 compared to wildtype.

747 **Figure 3. CHIKV AUD mutant replication in murine cells.** The indicated cells were  
748 transfected with CHIKV-D-luc-SGR wildtype and mutant RNAs and harvested for both

## Chikungunya virus nsP3 AUD function

---

749 RLuc and FLuc assays at the indicated time points. Luciferase values of wildtype  
750 and each mutant were normalized to 4 h values. (GAA: inactive mutant of nsP4  
751 polymerase). Significant differences denoted by \* ( $P<0.05$ ), and \*\* ( $P<0.01$ ),  
752 compared to wildtype.

753 **Figure 4. CHIKV AUD mutant replication in *Aedes albopictus* mosquito cells.** (A,  
754 B) The indicated cells were transfected with CHIKV-D-luc-SGR wildtype and mutant  
755 RNAs and harvested for both renilla and firefly luciferase assay at the indicated time  
756 points. Luciferase values of wildtype and each mutant were normalized to 4 h values.  
757 (GAA: inactive mutant of nsP4 polymerase). Significant differences denoted by \*\*  
758 ( $P<0.01$ ), compared to wildtype. (C) RT-PCR and sequencing analysis of CHIKV-D-  
759 luc-SGR-R243A/K245A. RNA was harvested at the indicated times, amplified by RT-  
760 PCR and sequenced. The wildtype and mutated sequences are shown below the  
761 sequence traces for reference. Nucleotide ambiguity codes used: R (A/G), S (G/C)  
762 and M (A/C).

763 **Figure 5. Phenotype of AUD mutations in the production of infectious virus.** (A)  
764 ICRES-RNAs were electroporated into C2C12 cells and supernatants were collected  
765 at 48 h.p.e. Virus was titrated by plaque assay in BHK-21 cells. (B) Plaques for  
766 wildtype and P247A/V248A were visualised illustrating the small plaque phenotype for  
767 this mutant. (C-E) C2C12 cells were infected with CHIKV (wildtype and mutants) at an  
768 MOI of 0.1. Supernatants were collected at the indicated times for genome RNA  
769 quantification (qRT-PCR) (C) and virus titration by plaque assay (D). The ratios of

## Chikungunya virus nsP3 AUD function

---

770 genome RNA:infectivity were determined from (C) and (D) at 16, 24 and 48 h.p.i. and  
771 presented graphically (E).

### 772 **Figure 6. Phenotype of AUD mutations on virus entry, release and assembly.** (A)

773 C2C12 cells were infected with CHIKV at MOI of 1. At 24 h.p.i, cells were washed with  
774 PBS and resuspended in 1 ml fresh medium. Cell suspensions were freeze/thawed 3  
775 times to release intracellular virus. Genome RNA was quantified by qRT-PCR, and  
776 virus titrated by plaque assay. (B) Graphical representation of the ratio of infectivity to  
777 genomic RNA. (C) Intracellular and extracellular viruses were collected at 36 h.p.e  
778 from C2C12 cells electroporated with the indicated ICRES RNA, and titrated by plaque  
779 assay. (D) Graphical representation of the ratio of extracellular to intracellular virus  
780 titres. Significant difference denoted by \* ( $P < 0.05$ ) compared to wildtype.

### 781 **Figure 7. Effect of AUD mutations on CHIKV protein expression and RNA**

782 **synthesis.** (A) C2C12 cells were electroporated with ICRES-RNAs and cell lysates  
783 were collected at 36 h.p.e. Expression of nsP3 and capsid was analysed by western  
784 blot. Multiple western blots were quantified using a LiCor Odyssey Sa fluorescence  
785 imager and the graph on the right shows the ratio of capsid to nsP3 expression. (B)  
786 C2C12 cells were electroporated with the indicated ICRES RNA, cellular RNA  
787 synthesis was inhibited by actinomycin D and nascent viral RNAs were labelled with  
788 [ $^3\text{H}$ ]-uridine. The graph on the right shows the ratio of gRNA to sgRNA. (C) The  
789 same RNAs were fractionated on a sucrose gradient and [ $^3\text{H}$ ]-labelled RNAs were  
790 detected by scintillation counting of individual fractions.

## Chikungunya virus nsP3 AUD function

---

791 **Figure 8. AUD RNA-binding activity to different viral RNAs.** (A) *E. coli* expressed  
792 AUD (wildtype and P247A/V248A) analysed by SDS-PAGE and Coomassie blue  
793 staining. (B) Circular Dichroism analysis of purified AUD. (C) Schematic of the CHIKV  
794 genome showing the location of the various RNAs used in subsequent filter binding  
795 analysis. (D-F) Filter binding analysis of the interaction between AUD and the  
796 indicated RNA species. Purified AUD at the indicated concentrations was incubated  
797 with radiolabelled RNA (1 nM) before application to a slot blot apparatus, filtering  
798 through nitrocellulose (protein-RNA complex) and Hybond-N (free RNA) membranes,  
799 and visualization by phosphoimaging. The negative control is wildtype AUD with an  
800 80-mer aptamer raised against the foot-and-mouth disease virus 3D RNA-dependent  
801 RNA polymerase [18]. The percentage of RNA bound to the nitrocellulose  
802 membrane was quantified and plotted as a function of the AUD concentration. The  
803 data was fitted to a hyperbolic equation. (G) Endpoint (% of total RNA bound) and  
804  $K_d$  values derived from the graphs in (D-F).

805 **Figure 9. CHIKV genome RNA association with nsP3 during virus replication.**  
806 C2C12 cells were electroporated with ICRES nsP3-TST RNAs. Cell lysates were  
807 collected at 60 h.p.e. and nsP3-TST was precipitated with Streptactin-sepharose  
808 beads. Bound proteins were subjected to western blotting (A) and co-precipitated  
809 RNAs were extracted by TRIzol and quantified by qRT-PCR (B). The ratio of gRNA  
810 to nsP3 is depicted graphically (C).



## Chikungunya virus nsP3 AUD function

---

811 **Figure 10. Fluorescence analysis of nsP3, capsid and dsRNA distribution during**  
812 **infection of C2C12 cells with wildtype CHIKV.** C2C12 cells were electroporated  
813 with ICRES-nsP3-ZsGreen-CHIKV RNA. Cells were fixed at the indicated time points  
814 post-infection and stained with antibodies to capsid protein (white) and dsRNA (red).  
815 Green: nsP3-ZsGreen fusion, blue: nuclear DAPI counterstain. The scale bars are 5  
816  $\mu\text{m}$  and 1  $\mu\text{m}$ , respectively.

817 **Figure 11. Fluorescence analysis of nsP3, capsid and dsRNA distribution during**  
818 **infection of C2C12 cells with P247A/V248A mutant CHIKV.** C2C12 cells were  
819 electroporated with ICRES-nsP3-ZsGreen-CHIKV-P247A/V248A RNA. Cells were  
820 fixed at the indicated time points post-infection and stained with antibodies to capsid  
821 protein (white) and dsRNA (red). Green: nsP3-ZsGreen fusion, blue: nuclear DAPI  
822 counterstain. The scale bars are 5  $\mu\text{m}$  and 1  $\mu\text{m}$ , respectively.

823 **Figure 12. Co-localisation of nsP3 with capsid protein and dsRNA during virus**  
824 **replication.** (A) Quantification of the percentages of nsP3 colocalised with dsRNA.  
825 Co-localisation of nsP3 with dsRNA. (B) Quantification of the percentages of nsP3  
826 colocalised with capsid. Co-localisation analysis (green blocks) were determined from  
827 5 cells for each construct using Fiji. \*\*\*\*, \* indicates significant difference ( $P < 0.0001$ ,  
828  $P < 0.0479$ , respectively) from the results for WT.

829

830

831 **Supporting Information**

832 **Supplementary Figure 1.** Alignment of AUD amino acid sequences (nsP3 residues  
833 210-276) and ribbon structure of Sindbis virus AUD showing location of mutated  
834 residues (PDB ID code 4GUA).

835 **Supplementary Figure 2:** Sequence analysis of virus passage P0.

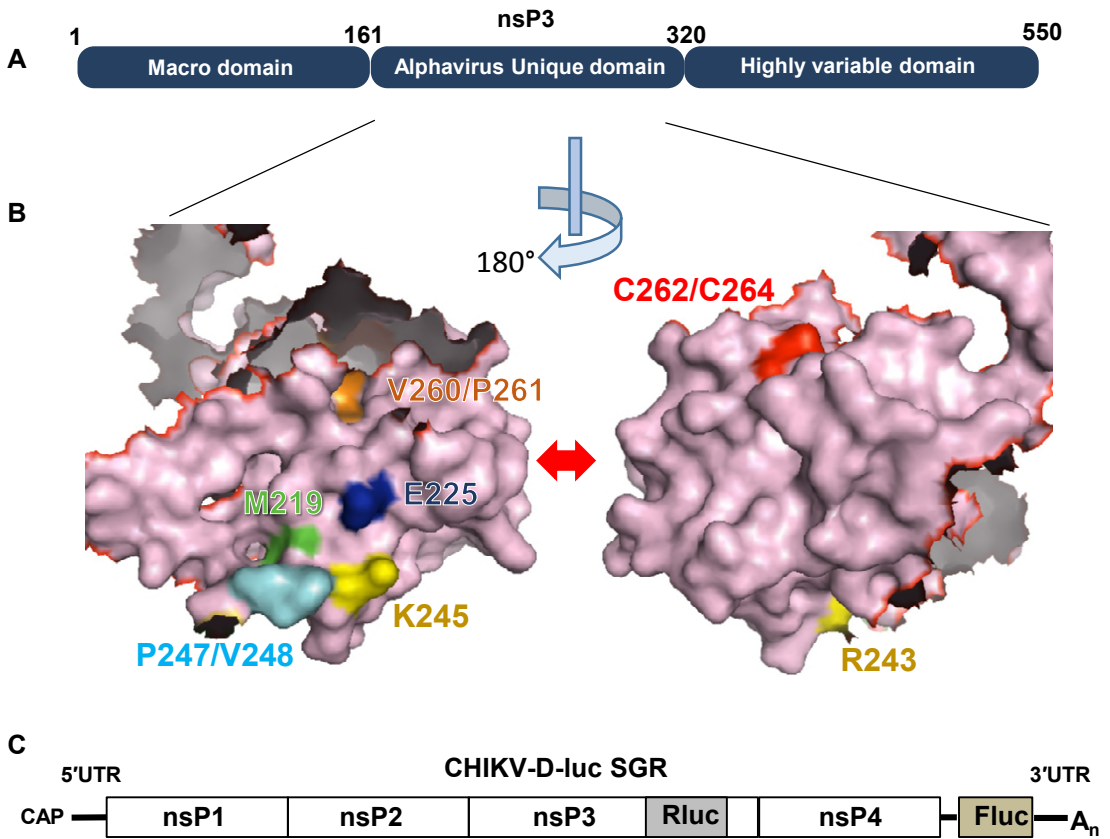

**Figure 1**

## A Huh7

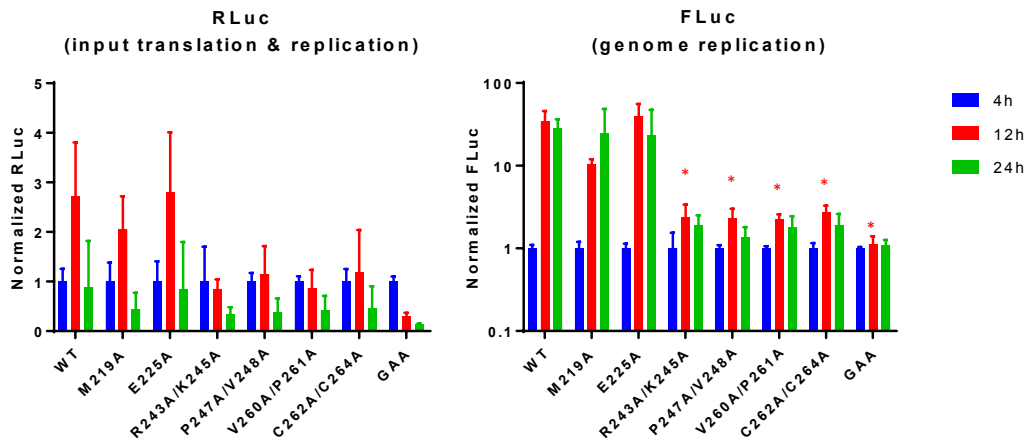

## B Huh7.5

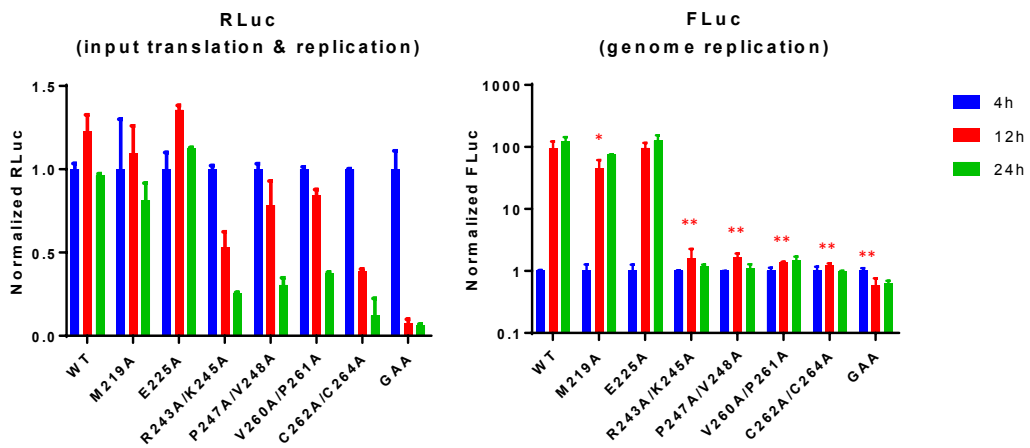

## C RD

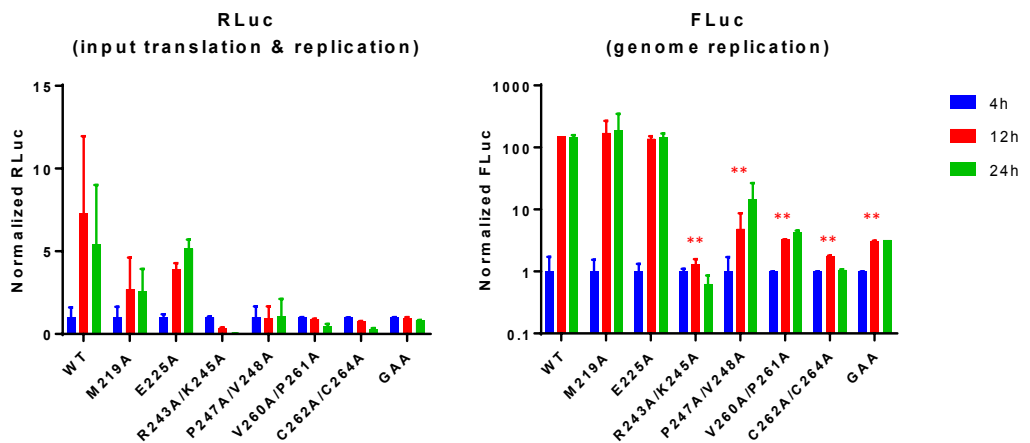

**Figure 2**

## A C2C12

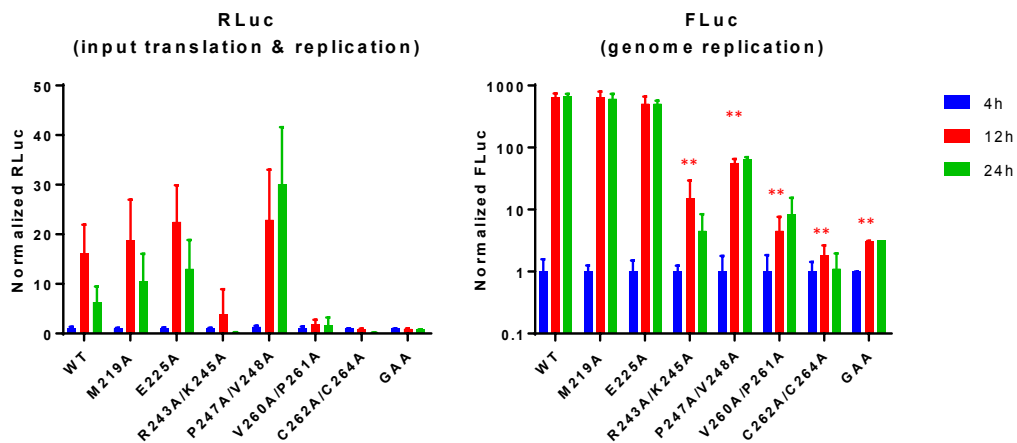

## B BHK

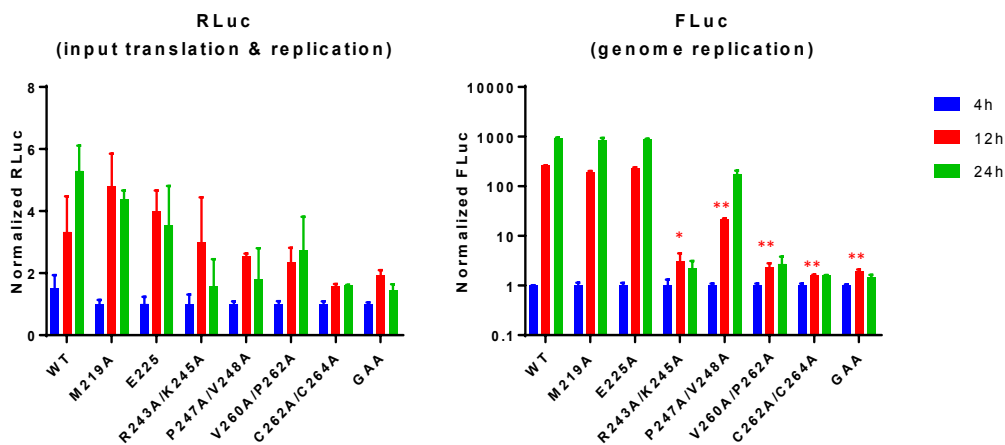

Figure 3

### A U4.4

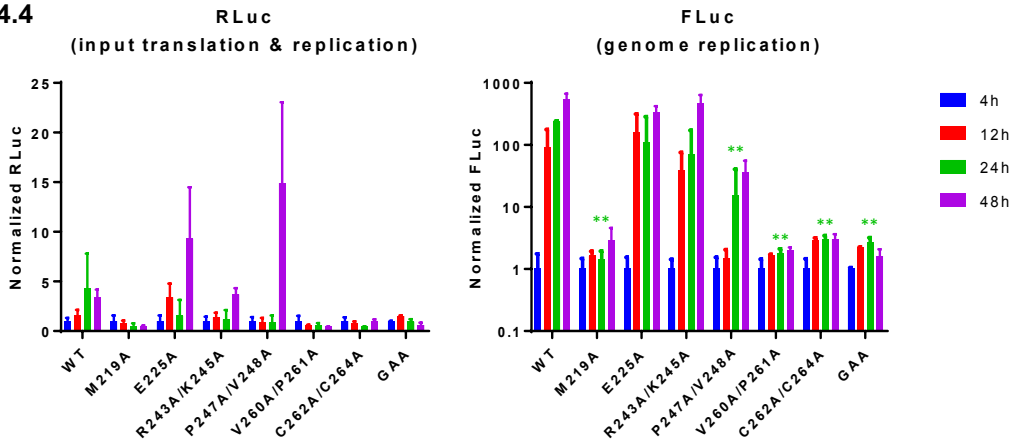

### B C6/36

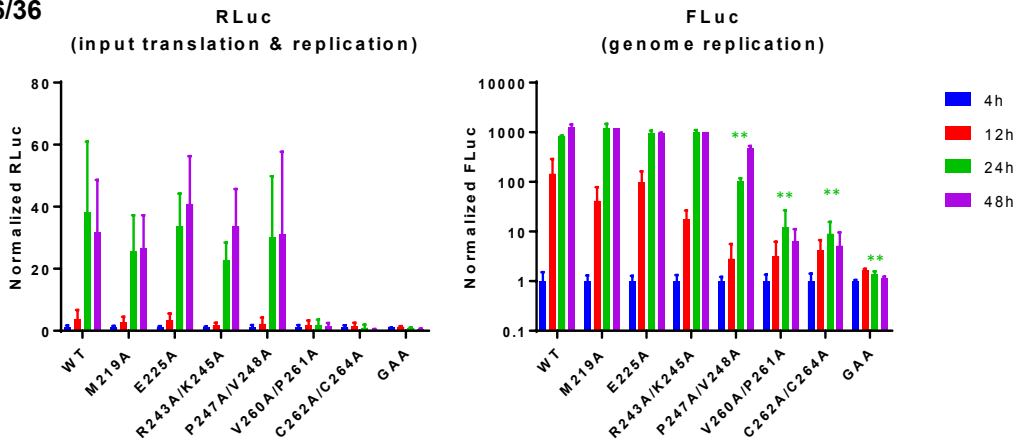

### C

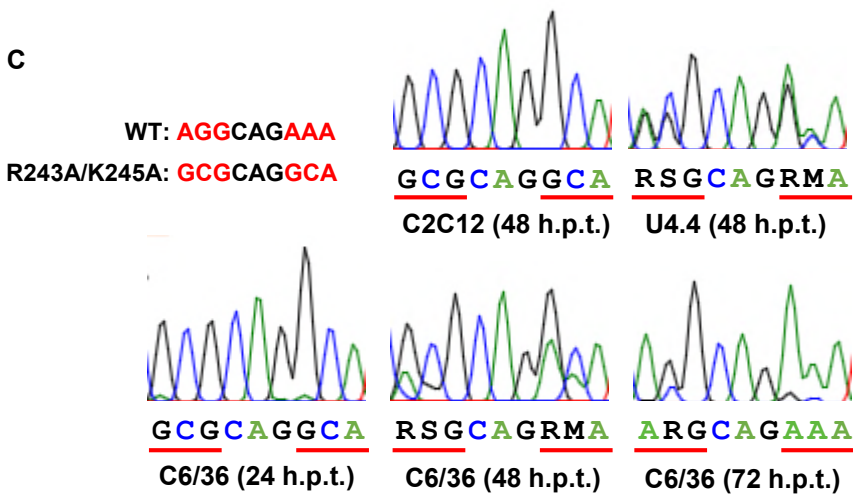

Figure 4

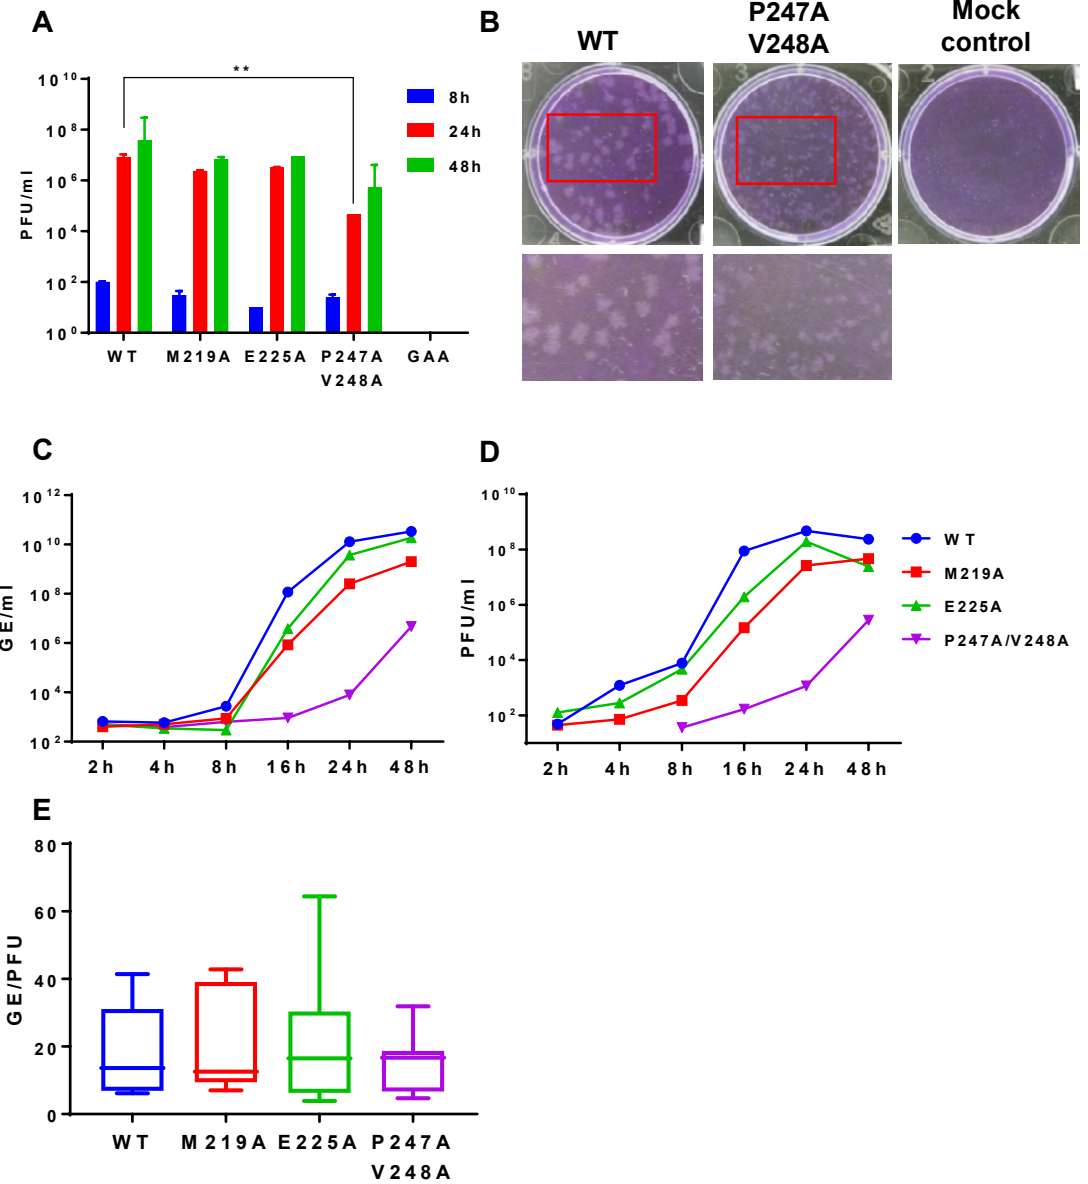

**Figure 5**

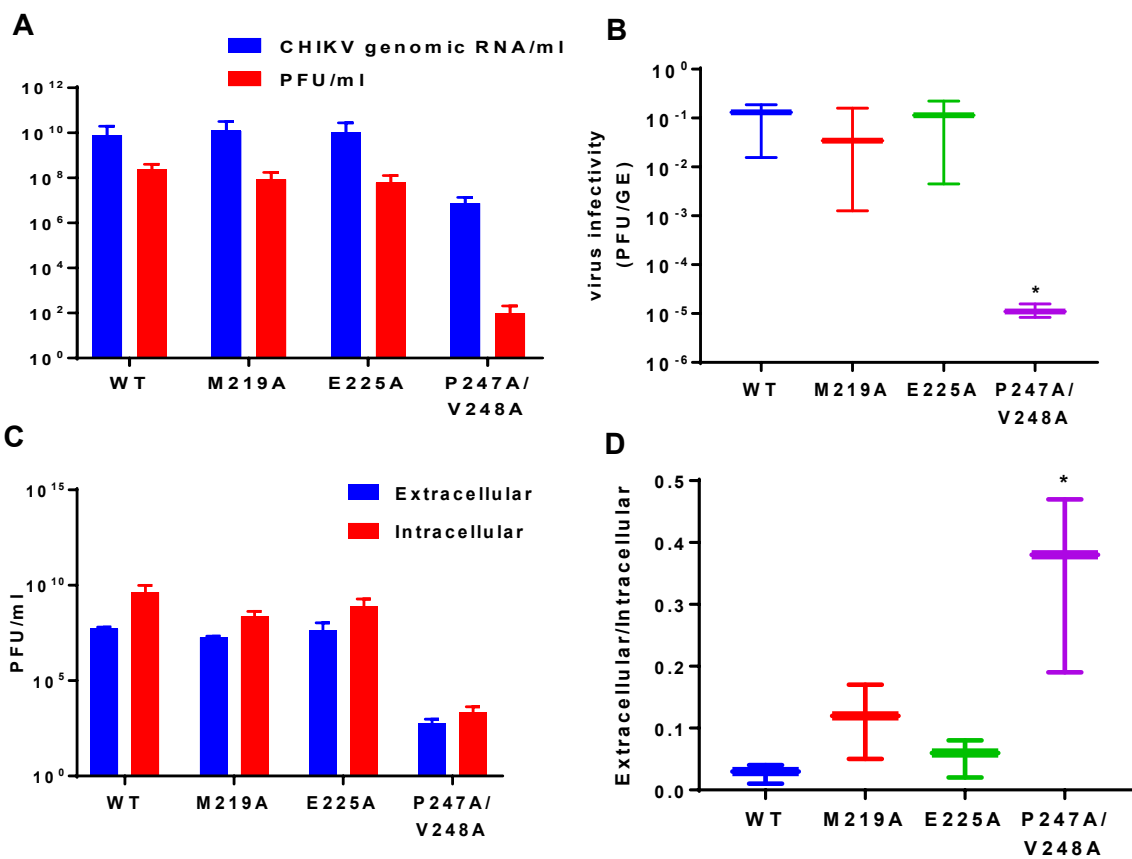

**Figure 6**



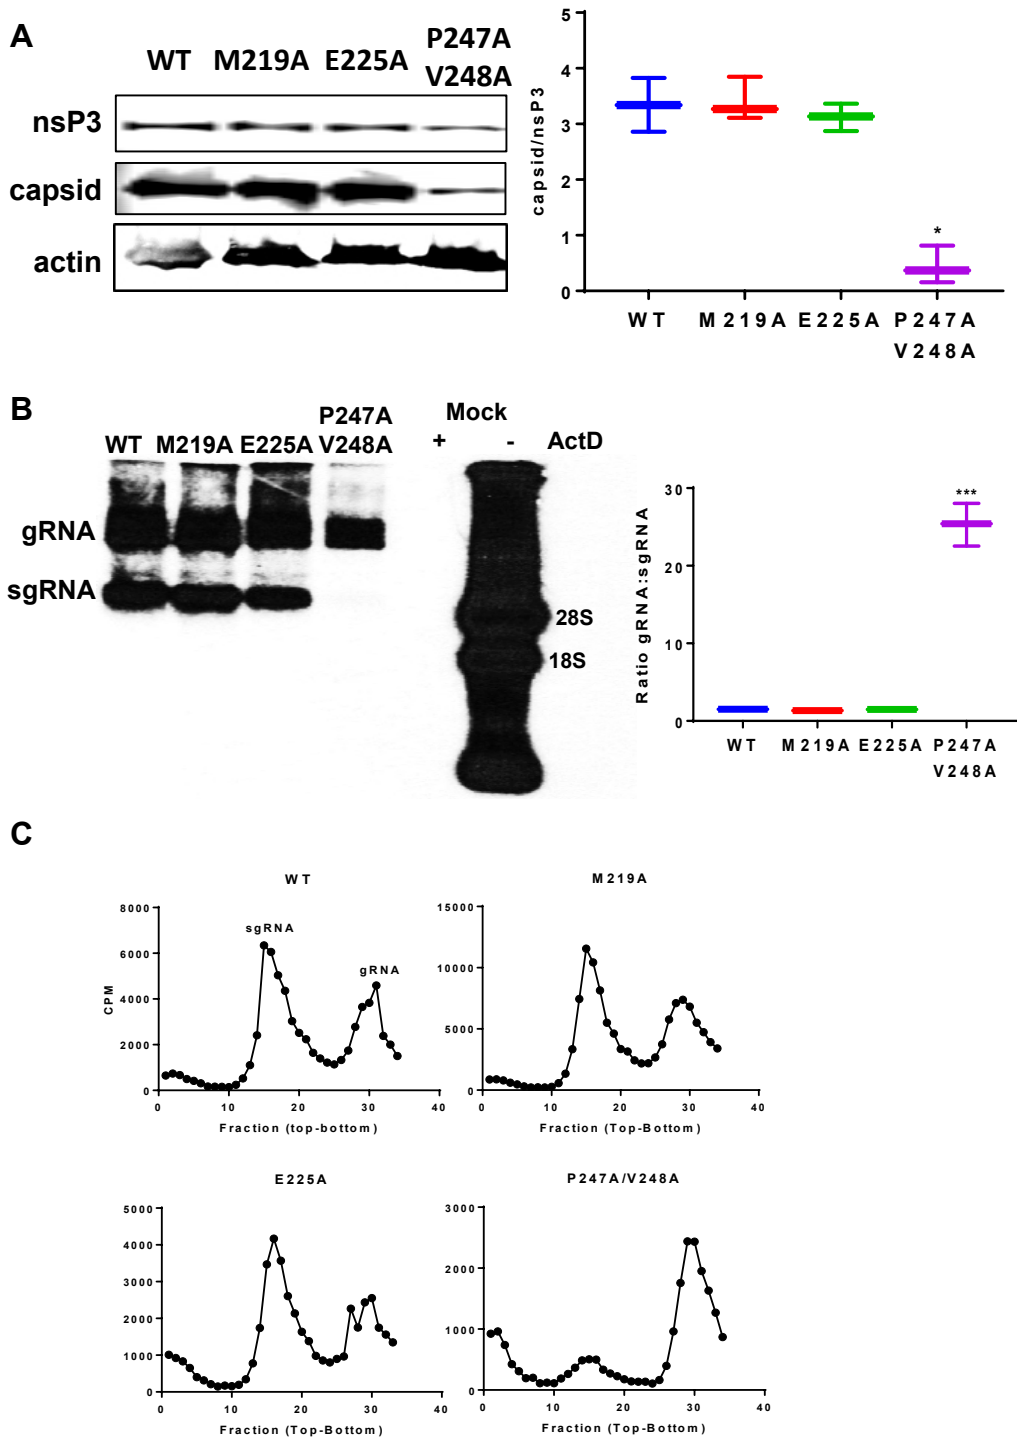

Figure 7

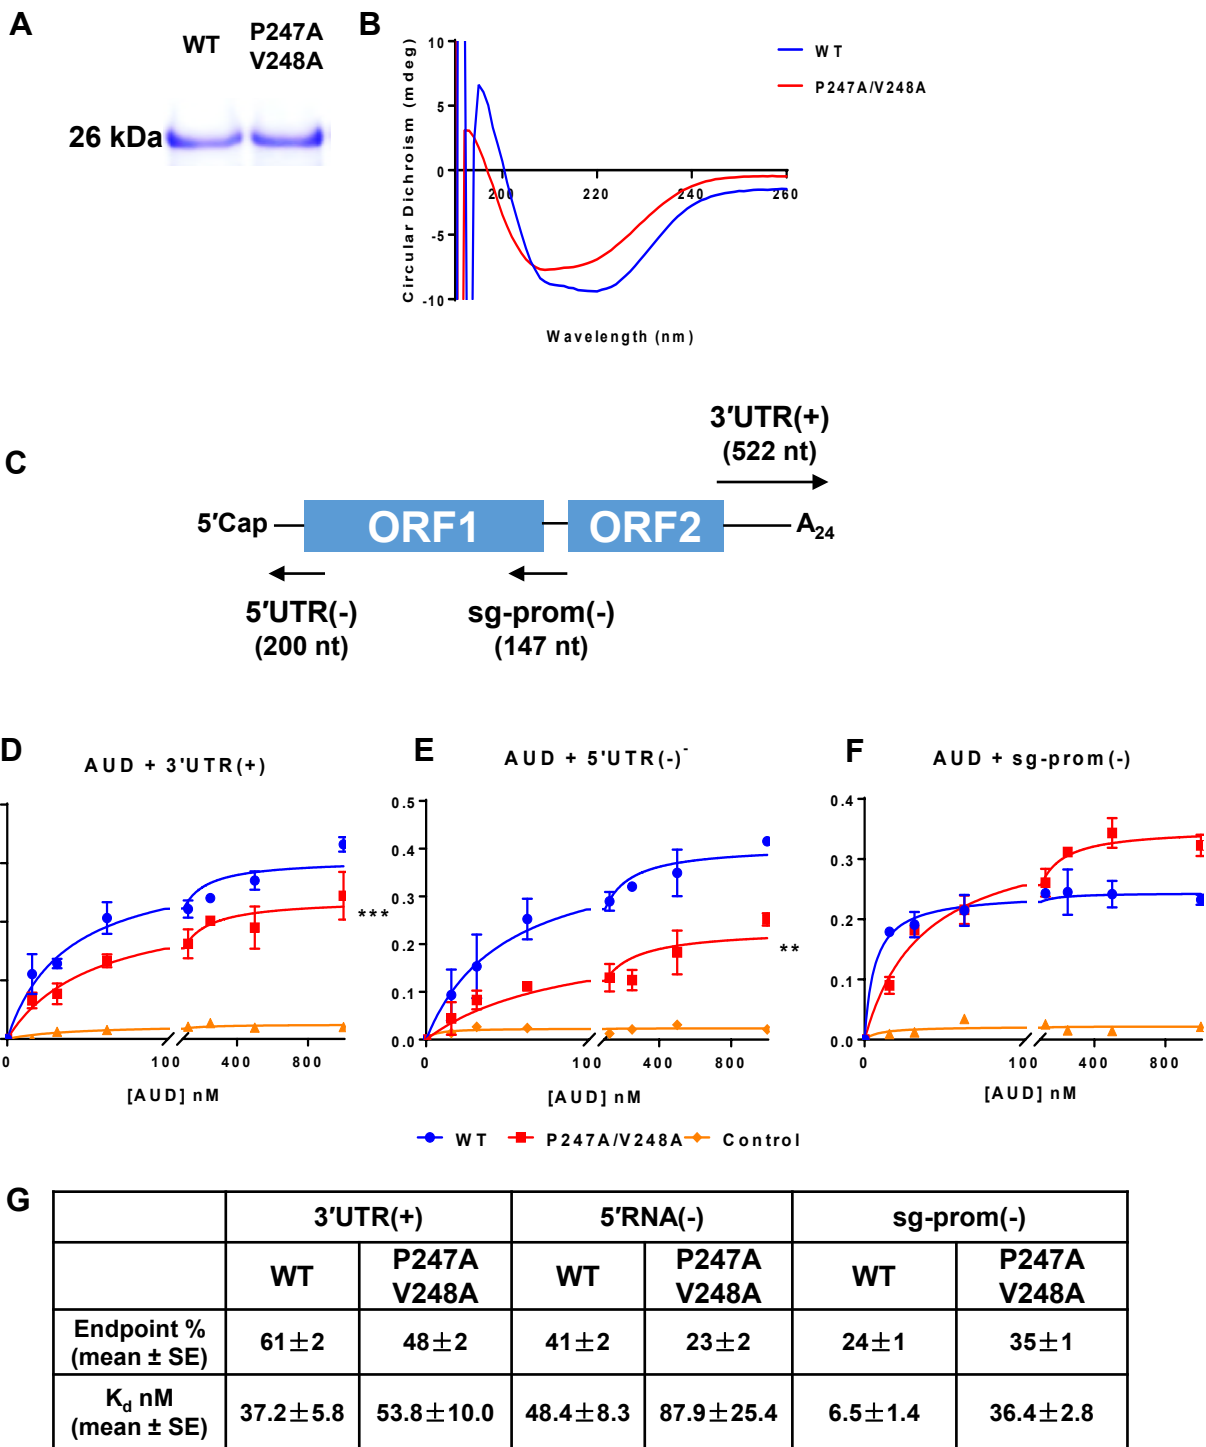

**Figure 8**

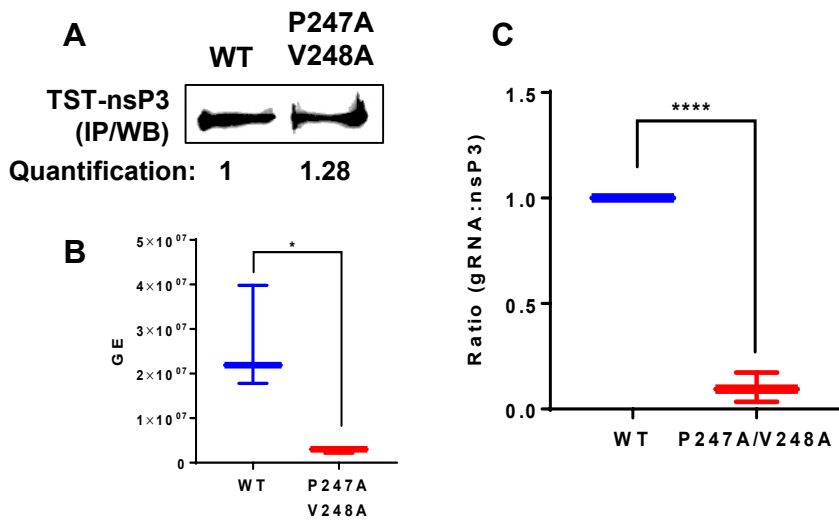

**Figure 9**

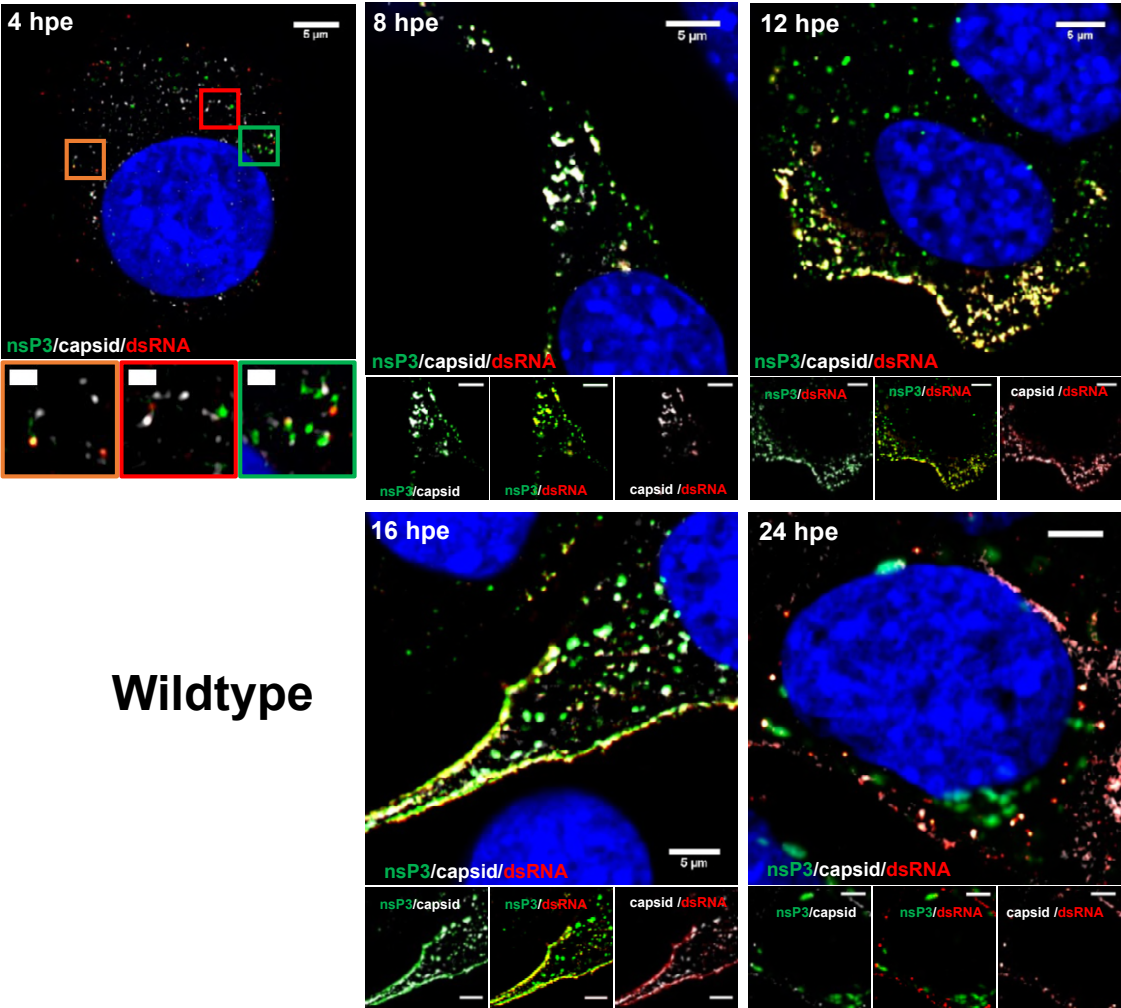

**Figure 10**

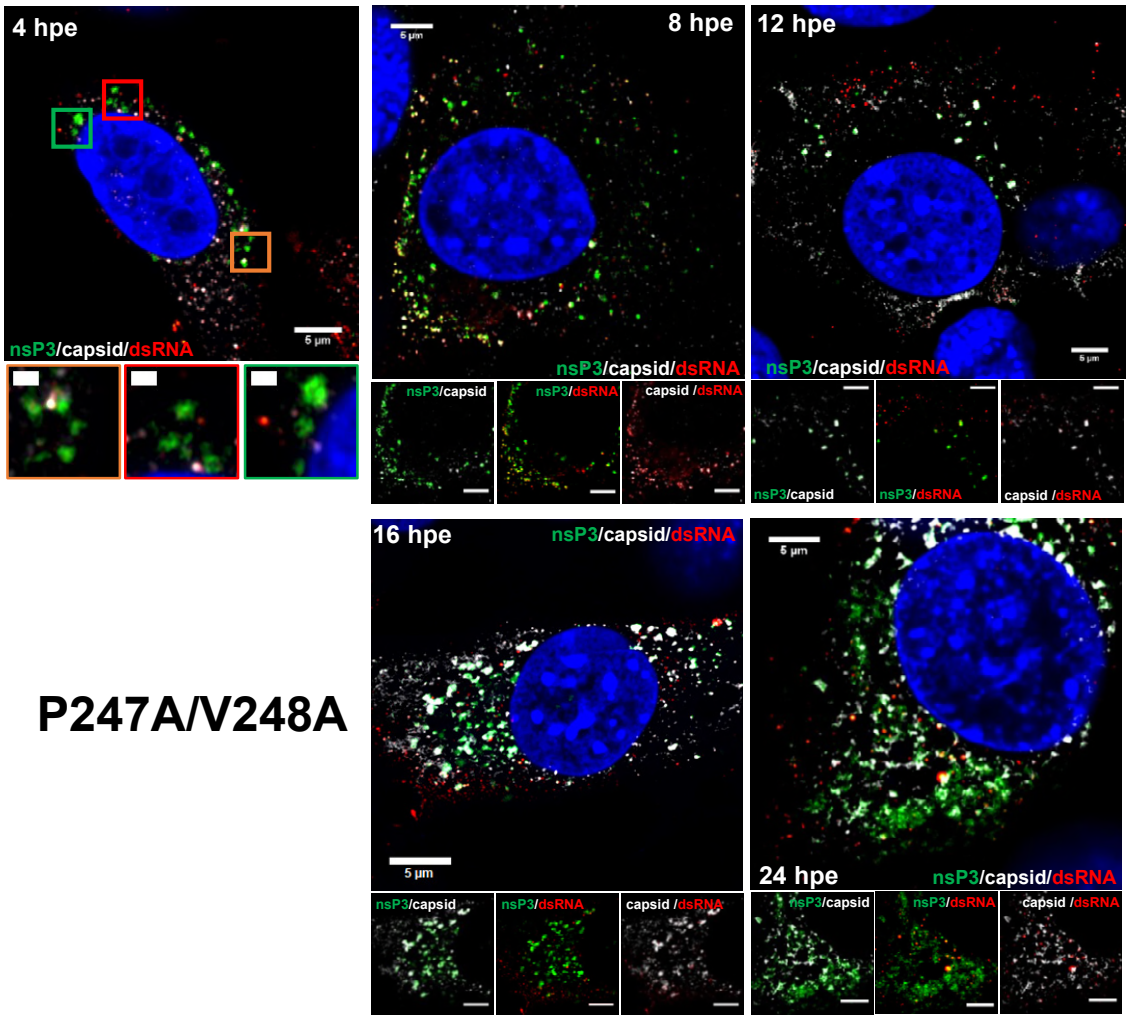

**P247A/V248A**

**Figure 11**

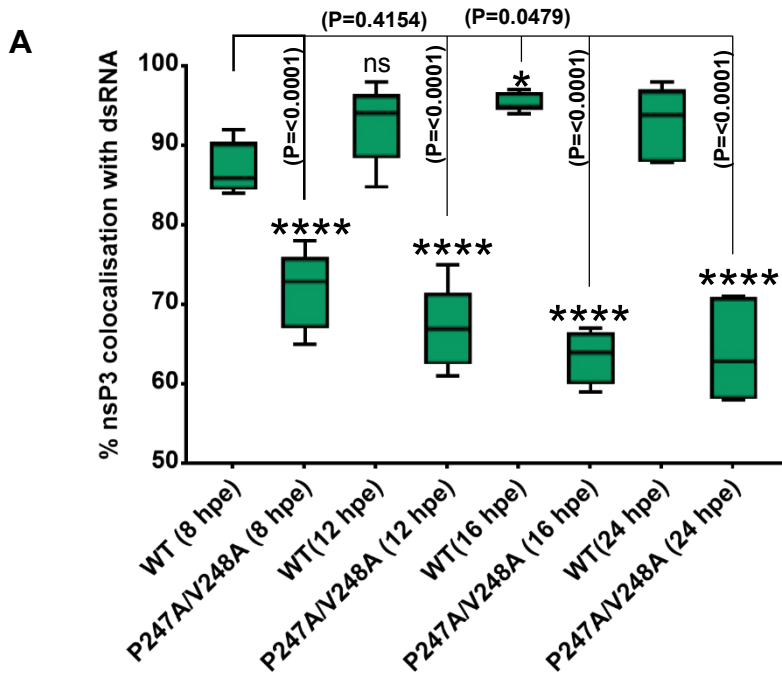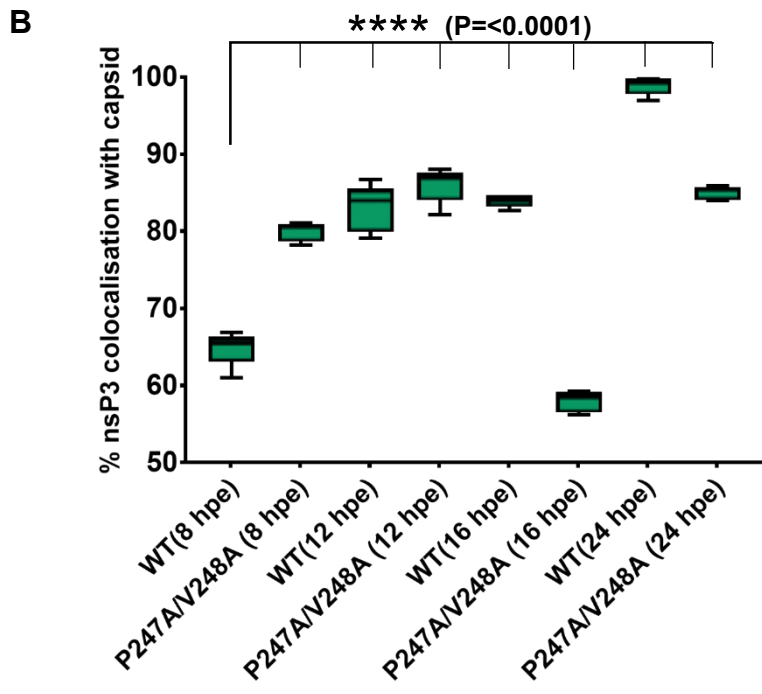

**Figure 12**
